# Supplementary material for: High-resolution mineral dust and sea ice proxy records from the Talos Dome ice core
Source: Copernicus journal article supplement (doi:10.5194/cp-9-2789-2013), 2013-12-23
Supplement: Supplementary file 1 [file cp-2013-84-supplement.xlsx]

## Sheet: Readme
Description of TALDICE CFA data published in Schüpbach et al., 2013, Clim. Past
In this file the 1cm resolution CFA data published by Schüpbach et al., 2013, Clim. Past, are archived.
Please cite the reference below when using this data.
REFERENCE
S. Schüpbach, U. Federer, P. R. Kaufmann, S. Albani, C. Barbante, T.F. Stocker, H. Fischer
High-resolution mineral dust and sea ice proxy records from the Talos Dome ice core
Clim. Past, 2013

## Sheet: TALDICE_1cm
TALDICE 1cm CFA data
Column 1: Depth from top (m)
Column 2: AICC2012 ice age (yrs BP, i.e. before 1950 AD)
Column 3: Na concentration (ppbw)
Column 4: Ca concentration (ppbw)
Depth	Ice age (AICC2012)	Na	Ca
(m)	(a BP, i.e. before 1950 AD)	(ppbw)	(ppbw)
305.005	3790.85	NaN	NaN
305.015	3791.02	NaN	NaN
305.025	3791.19	6.61788	0.237245
305.035	3791.36	3.56773	0.0235
305.045	3791.53	4.75302	NaN
305.055	3791.68	10.3247	0.821611
305.065	3791.84	13.0056	1.31089
305.075	3792	17.3878	1.15262
305.085	3792.17	19.7919	0.94532
305.095	3792.33	NaN	NaN
305.105	3792.49	NaN	NaN
305.115	3792.66	22.4369	0.876175
305.125	3792.82	24.1123	0.79369
305.135	3792.99	23.4736	0.99894
305.145	3793.16	18.8766	0.576045
305.155	3793.33	10.7653	0.27915
305.165	3793.5	5.71219	0.0921
305.175	3793.65	4.11489	0.105438
305.185	3793.81	3.11087	0.0101
305.195	3793.97	2.09709	NaN
305.205	3794.14	NaN	NaN
305.215	3794.3	1.7936	NaN
305.225	3794.46	1.29553	NaN
305.235	3794.63	2.72152	0.167783
305.245	3794.79	9.20108	0.78406
305.255	3794.96	12.0529	1.13662
305.265	3795.12	9.08892	1.11583
305.275	3795.29	7.57075	0.9222
305.285	3795.47	5.70682	1.07712
305.295	3795.63	7.56907	1.91781
305.305	3795.79	12.9504	2.27173
305.315	3795.94	13.8774	1.78824
305.325	3796.11	13.4449	1.63968
305.335	3796.27	12.9031	2.10686
305.345	3796.43	10.6304	1.77482
305.355	3796.6	8.93159	1.32505
305.365	3796.76	19.0889	1.44513
305.375	3796.93	30.1167	1.6995
305.385	3797.09	33.3215	1.99635
305.395	3797.26	33.3272	1.82799
305.405	3797.43	31.357	1.81991
305.415	3797.6	31.9784	2.02173
305.425	3797.75	32.5568	2.222
305.435	3797.91	32.4241	2.21634
305.445	3798.07	31.3459	2.1857
305.455	3798.24	28.2103	1.90284
305.465	3798.4	21.754	1.55777
305.475	3798.57	17.6094	1.43208
305.485	3798.73	21.0483	1.74843
305.495	3798.89	26.6235	2.06149
305.505	3799.06	28.587	2.32216
305.515	3799.22	27.2776	2.29136
305.525	3799.4	15.7637	1.74242
305.535	3799.57	10.288	1.63014
305.545	3799.73	13.4439	1.67799
305.555	3799.89	11.0606	1.89011
305.565	3800.04	5.80459	1.72816
305.575	3800.21	1.48749	1.21281
305.585	3800.37	NaN	1.16891
305.595	3800.54	NaN	1.25273
305.605	3800.7	NaN	1.15327
305.615	3800.86	2.3329	1.22741
305.625	3801.03	10.6103	2.93241
305.635	3801.19	18.9933	3.08828
305.645	3801.36	28.7241	2.55409
305.655	3801.54	26.4515	1.79809
305.665	3801.7	18.483	1.00094
305.675	3801.86	13.8959	0.761933
305.685	3802.01	7.94836	0.48472
305.695	3802.18	2.12191	NaN
305.705	3802.34	NaN	NaN
305.715	3802.5	NaN	NaN
305.725	3802.67	NaN	NaN
305.735	3802.83	4.28231	NaN
305.745	3803	12.0061	0.17815
305.755	3803.16	17.1607	0.3084
305.765	3803.33	19.8751	0.50033
305.775	3803.5	18.5074	0.862855
305.785	3803.67	11.4895	0.94576
305.795	3803.83	8.59864	1.20959
305.805	3803.99	10.9109	1.93897
305.815	3804.15	10.138	2.10105
305.825	3804.31	9.15661	1.78195
305.835	3804.47	7.95896	1.38753
305.845	3804.64	6.60071	4.15664
305.855	3804.8	6.34521	4.54503
305.865	3804.97	2.13066	1.56335
305.875	3805.13	NaN	0.298275
305.885	3805.29	NaN	0.0302
305.895	3805.47	0.880533	0.065925
305.905	3805.64	3.19113	0.2088
305.915	3805.8	4.91322	0.56306
305.925	3805.96	5.50706	0.670278
305.935	3806.12	5.67466	0.63922
305.945	3806.28	5.37005	0.59519
305.955	3806.44	4.9548	0.32839
305.965	3806.61	6.84176	0.542033
305.975	3806.77	9.47154	1.25984
305.985	3806.94	NaN	NaN
305.995	3807.1	NaN	NaN
306.005	3807.26	NaN	1.7685
306.015	3807.43	7.07599	1.94167
306.025	3807.6	6.11277	3.94006
306.035	3807.77	5.39115	5.50064
306.045	3807.94	5.83953	5.24848
306.055	3808.09	5.47814	4.16501
306.065	3808.25	4.24051	2.2195
306.075	3808.42	1.37291	0.90265
306.085	3808.58	NaN	0.45688
306.095	3808.74	NaN	0.43692
306.105	3808.91	NaN	0.44316
306.115	3809.07	NaN	0.21699
306.125	3809.24	1.12325	0.307425
306.135	3809.4	7.03912	0.0635167
306.145	3809.58	15.4076	0.393309
306.155	3809.75	17.7551	1.18447
306.165	3809.91	15.2089	1.60662
306.175	3810.07	7.95167	0.891589
306.185	3810.23	4.5688	0.33923
306.195	3810.39	15.3115	0.5191
306.205	3810.55	15.6303	1.34095
306.215	3810.72	8.42461	0.62665
306.225	3810.88	4.74253	0.6525
306.235	3811.05	5.72551	0.89771
306.245	3811.21	12.9671	1.70945
306.255	3811.38	20.393	3.33018
306.265	3811.54	23.0396	4.51854
306.275	3811.71	18.0517	2.54534
306.285	3811.89	14.6595	0.99323
306.295	3812.05	12.8505	0.32153
306.305	3812.21	10.2112	0.083275
306.315	3812.36	8.91869	0.094
306.325	3812.53	7.26378	0.19305
306.335	3812.69	5.00722	0.26135
306.345	3812.86	4.36068	0.44757
306.355	3813.02	3.57905	0.62404
306.365	3813.19	4.32922	0.5254
306.375	3813.35	4.8718	0.4072
306.385	3813.52	NaN	NaN
306.395	3813.69	4.65571	0.232689
306.405	3813.86	3.97399	0.105
306.415	3814.02	3.48757	NaN
306.425	3814.18	1.5926	NaN
306.435	3814.34	0.19355	NaN
306.445	3814.5	NaN	NaN
306.455	3814.67	0.742233	NaN
306.465	3814.83	4.04462	0.2992
306.475	3815	7.21018	0.82598
306.485	3815.16	6.41744	1.14311
306.495	3815.32	6.62253	1.11297
306.505	3815.49	9.376	1.03035
306.515	3815.65	9.27302	0.73815
306.525	3815.83	10.6169	0.451409
306.535	3816	8.5396	0.46444
306.545	3816.16	6.02944	0.27065
306.555	3816.32	12.6396	0.0934714
306.565	3816.48	12.8321	0.33239
306.575	3816.64	8.53857	0.41682
306.585	3816.81	6.35725	0.34402
306.595	3816.97	4.5463	0.19885
306.605	3817.13	4.84075	0.134933
306.615	3817.3	7.60403	0.2708
306.625	3817.46	11.4485	0.52809
306.635	3817.63	12.722	1.17926
306.645	3817.8	11.9117	1.1095
306.655	3817.97	13.4604	1.46213
306.665	3818.14	13.1797	1.2157
306.675	3818.29	11.5235	0.639956
306.685	3818.45	12.3431	0.2707
306.695	3818.61	13.2445	0.46443
306.705	3818.78	15.7118	0.35895
306.715	3818.94	16.182	0.215333
306.725	3819.11	12.9586	0.036
306.735	3819.27	9.86328	NaN
306.745	3819.44	11.7669	0.0354
306.755	3819.6	9.8959	0.100267
306.765	3819.77	5.83338	0.1422
306.775	3819.94	4.03203	0.32987
306.785	3820.11	3.71581	1.11842
306.795	3820.28	9.27138	1.34366
306.805	3820.43	24.84	2.4557
306.815	3820.59	24.6389	2.74113
306.825	3820.75	15.7452	2.61244
306.835	3820.92	10.6558	2.75565
306.845	3821.08	8.97061	2.62051
306.855	3821.25	8.89052	2.68836
306.865	3821.41	8.4683	2.60571
306.875	3821.58	9.821	2.34623
306.885	3821.74	11.3781	2.64653
306.895	3821.91	13.3745	3.26
306.905	3822.09	18.646	3.12189
306.915	3822.25	18.339	2.00083
306.925	3822.41	20.9449	2.07834
306.935	3822.56	15.742	3.90562
306.945	3822.73	6.55396	2.52587
306.955	3822.89	1.4535	0.87758
306.965	3823.06	1.55656	0.2007
306.975	3823.22	7.21745	1.89408
306.985	3823.39	10.2357	3.12749
306.995	3823.55	NaN	2.6218
307.005	3823.71	16.3072	3.19051
307.015	3823.88	26.6173	2.65513
307.025	3824.05	38.3176	2.84048
307.035	3824.23	32.2604	3.04996
307.045	3824.39	17.1426	2.53817
307.055	3824.55	7.69322	1.63365
307.065	3824.7	4.02829	1.27536
307.075	3824.87	2.13279	1.13698
307.085	3825.03	1.60944	1.03794
307.095	3825.2	1.12724	1.0175
307.105	3825.36	0.84511	0.787382
307.115	3825.53	1.62635	0.481962
307.125	3825.69	1.38317	0.612022
307.135	3825.86	1.13227	0.595012
307.145	3826.03	5.66751	0.76805
307.155	3826.2	8.08037	1.3156
307.165	3826.37	NaN	NaN
307.175	3826.53	7.93469	1.40073
307.185	3826.68	5.59267	0.812812
307.195	3826.85	1.71083	0.821802
307.205	3827.01	0.84383	0.915972
307.215	3827.18	3.29847	1.63562
307.225	3827.34	5.84388	1.67403
307.235	3827.51	6.40654	1.69939
307.245	3827.67	8.85621	2.35686
307.255	3827.84	10.9415	2.64425
307.265	3828	12.0949	2.33564
307.275	3828.17	12.2717	2.4809
307.285	3828.35	9.07245	1.80705
307.295	3828.51	6.28649	1.56059
307.305	3828.67	4.27926	1.34891
307.315	3828.83	6.48574	1.24424
307.325	3828.99	13.1771	1.38428
307.335	3829.16	19.736	1.58981
307.345	3829.32	23.2075	2.13594
307.355	3829.49	22.2625	1.72577
307.365	3829.65	19.9315	1.57109
307.375	3829.82	11.3166	1.93048
307.385	3829.98	5.22481	2.56824
307.395	3830.15	3.43906	2.30195
307.405	3830.33	2.50438	1.24372
307.415	3830.49	3.23188	0.542092
307.425	3830.65	4.02279	0.144815
307.435	3830.8	4.03693	0.303557
307.445	3830.97	2.79629	0.365862
307.455	3831.13	1.60015	0.067332
307.465	3831.3	1.0421	0.187295
307.475	3831.46	NaN	0.134882
307.485	3831.63	NaN	NaN
307.495	3831.79	NaN	NaN
307.505	3831.96	4.89143	0.00193203
307.515	3832.12	16.6407	0.350472
307.525	3832.3	20.4152	1.33974
307.535	3832.47	13.1612	1.61983
307.545	3832.64	9.12696	1.42907
307.555	3832.79	10.5584	1.33789
307.565	3832.95	14.0679	1.365
307.575	3833.11	16.2281	1.05314
307.585	3833.28	19.2392	1.19649
307.595	3833.44	21.477	1.36936
307.605	3833.61	18.8403	2.27251
307.615	3833.77	15.3911	2.20951
307.625	3833.94	14.6078	1.75024
307.635	3834.1	10.3834	1.11735
307.645	3834.28	9.6847	0.369459
307.655	3834.45	11.841	0.605252
307.665	3834.61	10.7372	0.964802
307.675	3834.77	8.26034	0.527665
307.685	3834.93	6.20986	0.0460445
307.695	3835.09	5.35166	0.281272
307.705	3835.26	4.5723	0.486892
307.715	3835.42	5.43585	0.378102
307.725	3835.59	8.73903	0.246422
307.735	3835.75	11.2876	0.165645
307.745	3835.92	8.43212	0.461302
307.755	3836.08	6.20815	0.604792
307.765	3836.25	6.56775	0.630332
307.775	3836.42	6.73316	1.01062
307.785	3836.59	7.05055	0.973202
307.795	3836.76	8.20079	0.848112
307.805	3836.91	11.5224	1.14028
307.815	3837.07	10.2395	1.2855
307.825	3837.24	8.55845	1.23584
307.835	3837.4	8.35084	1.24182
307.845	3837.57	7.53125	1.38866
307.855	3837.73	8.05728	1.38477
307.865	3837.9	7.87743	1.01737
307.875	3838.06	7.44648	0.794032
307.885	3838.23	7.28825	0.139382
307.895	3838.4	7.82218	0.646957
307.905	3838.57	8.05502	1.96184
307.915	3838.74	14.6351	2.08579
307.925	3838.89	19.3133	2.16625
307.935	3839.05	11.0396	1.52765
307.945	3839.21	6.50264	1.46817
307.955	3839.38	5.77242	1.0353
307.965	3839.54	4.99796	0.197388
307.975	3839.71	6.06621	NaN
307.985	3839.87	7.09459	0.501346
307.995	3840.04	7.6106	0.794665
308.005	3840.2	NaN	NaN
308.015	3840.37	0.907244	1.1242
308.025	3840.54	0.2457	0.324003
308.035	3840.72	0.971938	0.171038
308.045	3840.88	3.71264	0.218485
308.055	3841.04	10.8042	0.939491
308.065	3841.2	14.2452	1.28623
308.075	3841.36	14.3691	1.6768
308.085	3841.53	20.4818	2.03491
308.095	3841.69	23.4255	2.14644
308.105	3841.86	17.6291	1.81343
308.115	3842.02	10.2897	1.22404
308.125	3842.19	6.94589	1.12471
308.135	3842.35	6.64981	1.13895
308.145	3842.53	4.92794	1.10674
308.155	3842.7	3.1551	0.742043
308.165	3842.87	2.40637	0.665373
308.175	3843.02	5.2761	0.961924
308.185	3843.18	9.36175	0.998943
308.195	3843.35	11.111	2.18138
308.205	3843.51	11.4124	2.94518
308.215	3843.68	11.71	2.52129
308.225	3843.84	11.5464	3.006
308.235	3844.01	9.99778	1.94284
308.245	3844.17	5.81491	0.629803
308.255	3844.34	2.66161	0.241442
308.265	3844.5	1.00697	0.0349508
308.275	3844.68	0.0898	0.02298
308.285	3844.85	0.4576	NaN
308.295	3845.02	4.28291	0.363513
308.305	3845.17	7.09457	0.542602
308.315	3845.33	4.85047	0.534493
308.325	3845.5	2.31088	0.209438
308.335	3845.66	4.64148	1.70828
308.345	3845.83	7.1977	2.25891
308.355	3845.99	NaN	NaN
308.365	3846.16	8.22227	1.96068
308.375	3846.32	11.4077	1.94175
308.385	3846.49	13.1503	1.84886
308.395	3846.66	8.70827	0.824504
308.405	3846.84	4.96602	0.559503
308.415	3847	3.31666	0.836453
308.425	3847.16	1.93847	0.778613
308.435	3847.32	1.87238	0.972043
308.445	3847.48	1.76666	0.817433
308.455	3847.65	1.00522	1.22423
308.465	3847.81	1.18617	1.00797
308.475	3847.98	1.02504	0.850113
308.485	3848.14	1.74442	0.737733
308.495	3848.31	4.85467	0.862173
308.505	3848.47	5.10126	0.736753
308.515	3848.64	2.61194	0.682703
308.525	3848.81	0.579567	0.255403
308.535	3848.99	NaN	0.157213
308.545	3849.15	0.444875	NaN
308.555	3849.31	0.866878	NaN
308.565	3849.47	0.74857	NaN
308.575	3849.63	3.32825	NaN
308.585	3849.8	10.8909	0.316933
308.595	3849.96	17.3133	0.273123
308.605	3850.13	18.3853	0.352123
308.615	3850.29	12.765	0.172602
308.625	3850.46	8.80711	0.416073
308.635	3850.62	7.51365	0.835803
308.645	3850.8	4.79838	0.907604
308.655	3850.97	1.80242	0.834543
308.665	3851.14	1.86684	0.673373
308.675	3851.29	9.48337	1.85431
308.685	3851.45	17.296	3.47297
308.695	3851.62	17.7527	3.86022
308.705	3851.78	13.1496	2.81319
308.715	3851.95	9.16124	1.55203
308.725	3852.11	6.56233	0.994973
308.735	3852.28	4.43011	0.437893
308.745	3852.44	2.14796	0.215063
308.755	3852.61	1.06594	0.196643
308.765	3852.77	1.19626	0.230183
308.775	3852.95	4.16654	0.767459
308.785	3853.12	7.2958	0.978503
308.795	3853.29	7.75049	1.30408
308.805	3853.44	7.22692	1.26741
308.815	3853.6	6.60688	0.848883
308.825	3853.77	8.16339	0.668183
308.835	3853.93	9.7351	0.996963
308.845	3854.1	15.4831	1.38743
308.855	3854.26	19.1878	1.80058
308.865	3854.43	12.0212	1.48043
308.875	3854.59	5.83764	0.472293
308.885	3854.76	4.46389	0.593403
308.895	3854.93	8.36955	1.03328
308.905	3855.11	9.29648	1.06899
308.915	3855.27	16.4077	2.25114
308.925	3855.43	21.6026	2.13151
308.935	3855.59	14.286	1.6304
308.945	3855.75	7.15864	0.726123
308.955	3855.92	6.07896	0.240413
308.965	3856.08	6.56207	0.291091
308.975	3856.25	7.32989	0.368863
308.985	3856.41	8.64666	0.914923
308.995	3856.58	7.2894	1.70614
309.005	3856.74	6.27675	NaN
309.015	3856.91	4.76198	NaN
309.025	3857.08	4.36303	0.480482
309.035	3857.26	12.0236	0.780252
309.045	3857.42	15.5717	1.58095
309.055	3857.58	11.8916	1.35491
309.065	3857.74	9.81299	0.706742
309.075	3857.9	8.61696	0.903772
309.085	3858.07	9.12612	0.837972
309.095	3858.24	8.55283	0.957242
309.105	3858.4	8.26558	0.949902
309.115	3858.57	8.1998	0.838732
309.125	3858.73	5.75867	0.516582
309.135	3858.9	6.29082	0.356672
309.145	3859.07	8.03797	0.475862
309.155	3859.25	NaN	NaN
309.165	3859.41	6.99855	0.761907
309.175	3859.57	5.16288	0.56271
309.185	3859.73	5.6443	0.236102
309.195	3859.89	9.34795	0.611642
309.205	3860.06	8.68211	0.857392
309.215	3860.22	7.7789	0.707222
309.225	3860.39	8.32601	0.505112
309.235	3860.56	6.47199	0.572362
309.245	3860.72	8.50016	0.337752
309.255	3860.89	17.3921	0.612552
309.265	3861.05	17.6948	0.543462
309.275	3861.23	15.9501	0.418105
309.285	3861.4	15.1239	0.515292
309.295	3861.57	13.4049	0.507912
309.305	3861.72	10.4736	0.479754
309.315	3861.88	8.71686	0.951012
309.325	3862.05	11.0318	1.92352
309.335	3862.21	11.25	2.19833
309.345	3862.38	13.8746	1.33742
309.355	3862.54	21.4683	1.11899
309.365	3862.71	27.1545	1.64051
309.375	3862.88	32.317	1.5
309.385	3863.04	34.0748	1.65802
309.395	3863.22	34.0767	2.20841
309.405	3863.39	32.714	2.03188
309.415	3863.55	22.5829	2.26119
309.425	3863.71	11.7417	1.532
309.435	3863.87	5.06272	0.669402
309.445	3864.04	1.7431	0.606742
309.455	3864.2	1.12852	0.195445
309.465	3864.37	7.04014	0.445632
309.475	3864.53	17.498	1.1195
309.485	3864.7	23.0172	1.14762
309.495	3864.86	25.0323	1.0654
309.505	3865.03	24.1125	0.970212
309.515	3865.2	20.4018	0.926942
309.525	3865.37	12.3905	0.759841
309.535	3865.54	9.87046	0.629082
309.545	3865.71	10.393	1.43597
309.555	3865.87	7.45099	1.77502
309.565	3866.02	4.93047	1.15822
309.575	3866.19	3.03493	0.589212
309.585	3866.36	1.62027	0.685352
309.595	3866.52	1.15049	0.551142
309.605	3866.69	0.87636	0.537052
309.615	3866.85	1.13595	0.701452
309.625	3867.02	0.4961	0.424452
309.635	3867.18	NaN	0.257772
309.645	3867.36	NaN	0.155377
309.655	3867.53	2.68476	0.287142
309.665	3867.7	7.56629	0.697962
309.675	3867.85	5.82794	0.787788
309.685	3868.01	2.02671	0.510992
309.695	3868.18	0.1507	0.363772
309.705	3868.34	NaN	0.191199
309.715	3868.51	4.085	0.109599
309.725	3868.67	13.2224	0.752922
309.735	3868.84	11.2618	1.36505
309.745	3869.01	10.7562	1.29577
309.755	3869.17	18.6929	1.40491
309.765	3869.34	32.3274	1.82563
309.775	3869.51	40.7047	2.33674
309.785	3869.69	33.611	2.62119
309.795	3869.85	21.8516	1.55885
309.805	3870.01	14.4935	0.614976
309.815	3870.17	12.7004	0.583342
309.825	3870.33	12.6147	1.46152
309.835	3870.5	12.9651	1.79779
309.845	3870.66	10.1984	1.1184
309.855	3870.83	10.0749	0.416322
309.865	3870.99	12.2913	0.622722
309.875	3871.16	18.8125	0.611752
309.885	3871.33	23.0617	0.506582
309.895	3871.5	16.2198	0.583832
309.905	3871.67	13.7593	0.626882
309.915	3871.84	18.4168	1.00523
309.925	3872	23.2288	1.53455
309.935	3872.15	23.4241	1.60027
309.945	3872.32	21.3081	1.12198
309.955	3872.49	20.6708	1.01998
309.965	3872.65	22.4108	1.70655
309.975	3872.82	23.4158	2.26153
309.985	3872.98	NaN	NaN
309.995	3873.15	NaN	NaN
310.005	3873.31	NaN	NaN
310.015	3873.48	10.405	1.33518
310.025	3873.66	14.703	1.15858
310.035	3873.83	17.9095	1.24055
310.045	3874	19.5422	1.37975
310.055	3874.15	23.0835	1.44593
310.065	3874.31	25.5935	1.81192
310.075	3874.48	24.9415	1.67529
310.085	3874.64	17.4845	1.68792
310.095	3874.81	9.26716	1.39555
310.105	3874.98	4.05904	0.99896
310.115	3875.14	3.65575	0.96281
310.125	3875.31	5.37102	0.8878
310.135	3875.47	7.34558	0.85831
310.145	3875.65	10.9095	0.884073
310.155	3875.82	15.8412	0.83083
310.165	3875.99	17.7387	0.97311
310.175	3876.15	14.115	1.06491
310.185	3876.3	9.95201	1.24551
310.195	3876.47	9.7243	0.92375
310.205	3876.64	18.8012	1.19274
310.215	3876.8	21.9013	1.85433
310.225	3876.97	20.6746	1.75663
310.235	3877.14	19.7976	1.87945
310.245	3877.3	15.8747	2.29123
310.255	3877.47	10.8348	2.46266
310.265	3877.63	7.40889	2.03703
310.275	3877.81	12.5736	1.31199
310.285	3877.98	28.1137	2.12559
310.295	3878.15	39.0739	2.46917
310.305	3878.31	39.7065	2.33851
310.315	3878.46	28.1906	2.12555
310.325	3878.63	15.8676	1.83971
310.335	3878.8	16.1969	1.13822
310.345	3878.96	29.7791	1.55943
310.355	3879.13	34.0618	2.15916
310.365	3879.29	20.1857	1.79514
310.375	3879.46	12.6576	1.18779
310.385	3879.63	12.1589	1.39823
310.395	3879.8	12.6238	1.39293
310.405	3879.98	13.44	1.66555
310.415	3880.14	13.5533	1.6
310.425	3880.3	12.0213	1.50843
310.435	3880.46	10.9411	1.64504
310.445	3880.62	10.2997	1.5275
310.455	3880.79	9.80392	1.43609
310.465	3880.96	10.7274	1.73738
310.475	3881.12	11.0191	1.99317
310.485	3881.29	9.65192	2.15153
310.495	3881.45	6.95823	1.90741
310.505	3881.62	7.81965	2.09488
310.515	3881.79	7.8093	2.2985
310.525	3881.96	6.46095	1.15444
310.535	3882.13	8.14283	0.76442
310.545	3882.3	7.73132	0.73133
310.555	3882.46	6.6767	0.634256
310.565	3882.62	6.39063	0.232387
310.575	3882.78	7.47833	0.20771
310.585	3882.95	13.8861	0.64166
310.595	3883.11	24.8471	1.24758
310.605	3883.28	29.712	1.83406
310.615	3883.45	27.853	2.11575
310.625	3883.61	22.2599	2.97488
310.635	3883.78	14.1489	2.97413
310.645	3883.95	8.92046	1.29982
310.655	3884.13	7.47963	0.55694
310.665	3884.29	13.5181	1.05248
310.675	3884.45	19.9028	1.45197
310.685	3884.61	26.2291	1.45083
310.695	3884.78	31.5859	1.38822
310.705	3884.94	30.4498	1.09542
310.715	3885.11	24.0749	0.95825
310.725	3885.27	23.6169	0.37975
310.735	3885.44	24.8255	0.86547
310.745	3885.61	20.9389	1.82164
310.755	3885.77	22.3828	1.65494
310.765	3885.94	34.4925	3.91896
310.775	3886.11	28.2471	3.48804
310.785	3886.29	14.7332	1.44633
310.795	3886.45	7.54354	0.80597
310.805	3886.61	7.2309	0.562533
310.815	3886.77	9.51001	0.69115
310.825	3886.93	11.3714	0.74497
310.835	3887.1	11.8728	0.83138
310.845	3887.27	11.3984	1.15469
310.855	3887.43	12.1435	1.56242
310.865	3887.6	11.6068	1.40552
310.875	3887.77	10.2443	1.39138
310.885	3887.93	7.5188	1.04606
310.895	3888.11	5.23763	0.713855
310.905	3888.28	4.49423	0.56198
310.915	3888.45	2.37016	0.49223
310.925	3888.6	0.533417	0.524338
310.935	3888.76	NaN	0.094225
310.945	3888.93	0.44495	0.03405
310.955	3889.09	3.8976	0.477767
310.965	3889.26	8.85156	2.67627
310.975	3889.43	12.9197	4.58259
310.985	3889.59	15.1633	5.88225
310.995	3889.76	NaN	5.7881
311.005	3889.93	14.9448	NaN
311.015	3890.09	18.2868	8.55809
311.025	3890.27	16.7741	12.0535
311.035	3890.44	10.9636	6.97264
311.045	3890.61	6.54144	3.65197
311.055	3890.77	9.23853	2.21722
311.065	3890.93	14.9228	1.62801
311.075	3891.09	14.7873	1.75354
311.085	3891.26	12.7105	1.28198
311.095	3891.43	14.0868	1.04084
311.105	3891.6	27.7318	1.8121
311.115	3891.76	38.3794	2.95651
311.125	3891.93	37.7371	2.96844
311.135	3892.1	29.6938	2.44496
311.145	3892.27	22.0822	1.25935
311.155	3892.45	27.2173	1.22953
311.165	3892.61	33.884	1.5562
311.175	3892.77	35.7828	1.68483
311.185	3892.93	33.9535	1.94976
311.195	3893.1	29.4818	1.99735
311.205	3893.27	21.2414	1.92491
311.215	3893.43	15.4861	1.15155
311.225	3893.6	12.2371	1.1798
311.235	3893.77	8.29909	1.28979
311.245	3893.93	NaN	NaN
311.255	3894.1	NaN	NaN
311.265	3894.27	NaN	NaN
311.275	3894.44	NaN	NaN
311.285	3894.62	NaN	NaN
311.295	3894.78	NaN	NaN
311.305	3894.94	5.13473	1.36079
311.315	3895.1	2.66916	1.15268
311.325	3895.27	3.14134	0.84017
311.335	3895.44	10.8865	0.72229
311.345	3895.6	19.7831	1.44165
311.355	3895.77	19.808	1.63206
311.365	3895.94	16.4246	1.65703
311.375	3896.1	16.5129	1.33154
311.385	3896.27	17.6921	0.9898
311.395	3896.45	17.0684	0.893027
311.405	3896.62	17.5782	0.7414
311.415	3896.79	17.7899	0.530837
311.425	3896.95	16.2045	0.0389
311.435	3897.11	12.9721	0.0079
311.445	3897.27	11.8558	NaN
311.455	3897.44	13.6382	0.2597
311.465	3897.61	14.9724	0.80981
311.475	3897.77	15.3256	1.00029
311.485	3897.94	16.8726	1.41141
311.495	3898.11	18.3986	1.35524
311.505	3898.28	17.8843	1.41911
311.515	3898.44	18.5929	1.72965
311.525	3898.62	19.5541	2.48284
311.535	3898.79	19.9876	1.95188
311.545	3898.96	26.242	1.82759
311.555	3899.12	27.4202	1.98227
311.565	3899.28	19.1915	1.68264
311.575	3899.44	14.5128	1.11376
311.585	3899.61	11.1458	1.27176
311.595	3899.78	7.84122	1.16697
311.605	3899.95	5.68827	0.60785
311.615	3900.11	7.39059	0.32464
311.625	3900.28	10.0882	0.80071
311.635	3900.45	11.0633	1.40653
311.645	3900.62	13.2312	1.91431
311.655	3900.8	14.3087	2.10252
311.665	3900.96	14.8396	1.72838
311.675	3901.12	15.848	1.04333
311.685	3901.28	15.4054	0.7171
311.695	3901.45	22.1499	0.79403
311.705	3901.62	37.5823	0.64062
311.715	3901.78	46.5122	0.604
311.725	3901.95	50.4453	0.69717
311.735	3902.12	47.5154	0.76114
311.745	3902.28	35.1678	0.3708
311.755	3902.45	24.7345	0.51266
311.765	3902.62	19.0435	0.69347
311.775	3902.79	15.9641	0.271745
311.785	3902.97	12.9281	0.217925
311.795	3903.13	9.60692	NaN
311.805	3903.29	11.7299	0.104333
311.815	3903.45	15.4547	0.51377
311.825	3903.62	27.7439	1.18136
311.835	3903.79	29.8235	2.84843
311.845	3903.95	22.6976	2.1531
311.855	3904.12	23.3112	1.69795
311.865	3904.29	25.6559	2.06705
311.875	3904.45	21.1495	1.8877
311.885	3904.62	14.8291	1.27029
311.895	3904.8	19.7744	1.42411
311.905	3904.97	17.9738	1.74255
311.915	3905.14	13.4552	1.21275
311.925	3905.3	14.989	2.39299
311.935	3905.46	20.2726	3.01512
311.945	3905.62	18.8915	3.1268
311.955	3905.79	NaN	NaN
311.965	3905.96	NaN	NaN
311.975	3906.12	NaN	NaN
311.985	3906.29	NaN	NaN
311.995	3906.46	NaN	NaN
312.005	3906.63	NaN	NaN
312.015	3906.8	15.4835	0.1634
312.025	3906.98	17.9531	0.50274
312.035	3907.16	19.9906	0.87518
312.045	3907.33	19.1151	0.34192
312.055	3907.49	18.2025	0.270622
312.065	3907.66	33.1792	1.73471
312.075	3907.83	61.6833	2.63762
312.085	3908	67.1626	2.8222
312.095	3908.17	50.1788	2.52483
312.105	3908.35	36.7252	1.39927
312.115	3908.52	30.1744	0.85306
312.125	3908.69	18.6943	1.03132
312.135	3908.86	10.4113	1.10289
312.145	3909.04	9.09037	1.08815
312.155	3909.22	12.2457	2.2575
312.165	3909.39	11.6346	1.54263
312.175	3909.56	7.1422	1.0204
312.185	3909.72	3.65569	1.04587
312.195	3909.89	0.659465	0.6191
312.205	3910.06	NaN	0.30887
312.215	3910.24	NaN	0.21871
312.225	3910.41	NaN	0.39371
312.235	3910.58	1.44169	1.36444
312.245	3910.75	3.87973	1.66859
312.255	3910.92	5.87182	2.01171
312.265	3911.09	6.91479	1.91816
312.275	3911.27	6.43686	1.52678
312.285	3911.45	7.29408	2.05361
312.295	3911.63	7.69312	1.63996
312.305	3911.79	4.59711	1.12782
312.315	3911.95	3.06921	1.31139
312.325	3912.12	5.53735	1.60911
312.335	3912.3	3.84213	1.36986
312.345	3912.47	1.04377	1.63847
312.355	3912.64	NaN	2.93296
312.365	3912.81	NaN	3.32475
312.375	3912.98	NaN	2.21892
312.385	3913.16	NaN	1.24229
312.395	3913.34	3.7738	1.11681
312.405	3913.52	14.9265	1.67838
312.415	3913.69	30.9318	2.29001
312.425	3913.85	28.3358	1.62125
312.435	3914.01	NaN	NaN
312.445	3914.19	18.1018	1.33733
312.455	3914.36	6.54023	1.46269
312.465	3914.53	1.07066	1.30111
312.475	3914.7	NaN	0.70924
312.485	3914.87	NaN	0.4699
312.495	3915.05	1.27869	0.33726
312.505	3915.22	14.7898	1.56007
312.515	3915.39	44.4342	3.83408
312.525	3915.57	34.4967	2.04223
312.535	3915.75	15.9258	0.90222
312.545	3915.92	6.9431	0.60467
312.555	3916.08	4.52515	0.886389
312.565	3916.25	9.45574	1.02305
312.575	3916.42	10.4327	1.00041
312.585	3916.59	11.3502	0.75106
312.595	3916.76	10.1542	0.8511
312.605	3916.94	14.4422	1.08711
312.615	3917.11	18.2318	1.26826
312.625	3917.28	22.2504	1.89586
312.635	3917.45	29.5785	1.85063
312.645	3917.63	36.2058	1.59888
312.655	3917.81	33.9376	1.27048
312.665	3917.98	23.7004	0.97263
312.675	3918.15	17.6991	0.254725
312.685	3918.31	17.0328	0.105356
312.695	3918.48	19.538	0.605378
312.705	3918.65	22.8419	1.53591
312.715	3918.83	24.7052	1.88208
312.725	3919	25.9132	1.78803
312.735	3919.17	26.2142	1.63897
312.745	3919.34	25.0781	1.51903
312.755	3919.51	25.3973	1.50577
312.765	3919.68	26.2118	1.29174
312.775	3919.86	28.4272	1.3819
312.785	3920.04	25.0776	1.31613
312.795	3920.22	12.5045	1.49059
312.805	3920.38	4.8028	1.57063
312.815	3920.54	2.17299	2.02484
312.825	3920.71	8.39586	2.84598
312.835	3920.89	16.7511	3.12056
312.845	3921.06	26.4604	2.24987
312.855	3921.23	25.8135	2.04877
312.865	3921.4	15.2477	1.54386
312.875	3921.57	10.3838	0.92572
312.885	3921.75	6.51483	1.11285
312.895	3921.93	6.89625	0.569745
312.905	3922.11	9.17453	0.71594
312.915	3922.28	5.34021	0.6278
312.925	3922.44	4.60014	0.251411
312.935	3922.6	5.24269	0.62116
312.945	3922.78	7.36317	1.03458
312.955	3922.95	8.02902	0.7428
312.965	3923.12	16.2967	0.99105
312.975	3923.29	33.1629	1.1324
312.985	3923.46	32.4857	0.99861
312.995	3923.64	NaN	1.01227
313.005	3923.81	NaN	NaN
313.015	3923.98	11.4108	3.21061
313.025	3924.16	11.6569	3.50048
313.035	3924.34	9.30909	4.23959
313.045	3924.51	6.43543	4.73704
313.055	3924.68	9.43971	4.42133
313.065	3924.84	13.9428	2.68503
313.075	3925.01	16.8696	1.43556
313.085	3925.18	22.2265	0.920496
313.095	3925.36	19.3353	1.07507
313.105	3925.53	14.065	1.05822
313.115	3925.7	13.6022	0.465626
313.125	3925.87	15.4198	0.364626
313.135	3926.04	13.0087	0.140696
313.145	3926.23	8.54487	0.088309
313.155	3926.41	12.1735	NaN
313.165	3926.58	21.2734	NaN
313.175	3926.74	19.7715	1.01168
313.185	3926.91	19.4775	1.20792
313.195	3927.08	15.4546	1.29778
313.205	3927.25	9.2803	1.24206
313.215	3927.42	7.09947	1.23808
313.225	3927.59	4.10385	0.968746
313.235	3927.77	1.13828	0.569976
313.245	3927.94	1.36141	0.220976
313.255	3928.11	1.03217	0.0430257
313.265	3928.28	NaN	NaN
313.275	3928.46	0.8345	0.0287924
313.285	3928.64	0.573657	0.172126
313.295	3928.82	1.3773	0.492926
313.305	3928.98	5.83074	1.49161
313.315	3929.14	5.99205	1.16468
313.325	3929.31	3.39159	0.934109
313.335	3929.49	7.9602	1.1131
313.345	3929.66	27.5841	1.90935
313.355	3929.83	79.9304	2.87912
313.365	3930	107.294	4.84524
313.375	3930.18	74.9508	6.20643
313.385	3930.35	47.9948	4.36825
313.395	3930.53	35.217	3.34732
313.405	3930.71	28.7664	3.0269
313.415	3930.88	20.7913	2.43086
313.425	3931.04	10.8659	1.43925
313.435	3931.21	11.8389	1.02242
313.445	3931.38	17.8649	1.04754
313.455	3931.55	22.9997	1.43822
313.465	3931.72	25.3911	1.86121
313.475	3931.9	21.3659	1.61134
313.485	3932.07	16.4433	0.782316
313.495	3932.24	19.379	0.635876
313.505	3932.41	23.3117	1.15587
313.515	3932.58	31.17	1.61761
313.525	3932.77	26.1738	1.98603
313.535	3932.95	17.3091	0.800506
313.545	3933.12	14.4934	0.175798
313.555	3933.28	11.611	0.102309
313.565	3933.45	11.1762	0.00187571
313.575	3933.62	10.7658	0.132459
313.585	3933.79	9.27518	0.508756
313.595	3933.96	9.9113	0.702016
313.605	3934.13	11.807	0.704426
313.615	3934.31	17.9332	0.949536
313.625	3934.48	15.4338	1.01347
313.635	3934.65	9.16011	1.02558
313.645	3934.83	3.25896	1.09912
313.655	3935.01	NaN	0.463686
313.665	3935.18	NaN	0.343126
313.675	3935.35	NaN	0.41402
313.685	3935.51	6.65028	0.526226
313.695	3935.68	26.2002	1.32119
313.705	3935.85	54.7747	2.12261
313.715	3936.03	80.4722	2.67158
313.725	3936.2	90.8993	3.05238
313.735	3936.37	78.5295	3.57545
313.745	3936.54	38.1088	2.38727
313.755	3936.71	10.353	1.08906
313.765	3936.89	7.14416	1.04939
313.775	3937.07	13.4333	0.883594
313.785	3937.25	15.5525	0.804486
313.795	3937.42	13.0173	1.04295
313.805	3937.58	10.3907	1.05002
313.815	3937.75	13.6507	1.28391
313.825	3937.92	13.2224	1.33148
313.835	3938.09	6.92568	0.845196
313.845	3938.26	2.54428	0.335751
313.855	3938.44	2.90695	0.432496
313.865	3938.61	5.66819	0.374531
313.875	3938.78	6.77802	NaN
313.885	3938.95	7.36429	0.136138
313.895	3939.13	6.37739	0.30323
313.905	3939.31	5.46038	0.559286
313.915	3939.49	3.27581	0.609936
313.925	3939.65	5.24616	0.470331
313.935	3939.81	15.8313	0.773236
313.945	3939.98	35.1135	1.52912
313.955	3940.16	51.2988	2.5374
313.965	3940.33	54.5691	3.40649
313.975	3940.5	45.1082	4.25653
313.985	3940.67	NaN	3.93758
313.995	3940.85	NaN	NaN
314.005	3941.02	NaN	NaN
314.015	3941.19	9.85206	1.52743
314.025	3941.37	10.8743	1.17656
314.035	3941.55	11.72	1.14704
314.045	3941.72	9.89049	1.45418
314.055	3941.89	5.90691	1.71708
314.065	3942.05	7.75793	1.68354
314.075	3942.22	18.4795	1.53806
314.085	3942.4	16.0549	1.71928
314.095	3942.57	11.0657	2.49257
314.105	3942.74	8.3504	3.7673
314.115	3942.91	7.27423	3.05574
314.125	3943.09	7.55481	2.58353
314.135	3943.26	8.00087	2.49637
314.145	3943.44	13.3238	2.26881
314.155	3943.62	17.89	2.27391
314.165	3943.79	19.3976	2.47146
314.175	3943.96	21.0373	2.69221
314.185	3944.12	21.6958	3.05386
314.195	3944.29	21.1779	3.27085
314.205	3944.46	20.9588	3.07054
314.215	3944.64	18.6223	3.53988
314.225	3944.81	17.1835	3.18425
314.235	3944.98	17.0619	2.36262
314.245	3945.15	14.9348	1.61528
314.255	3945.33	14.1041	1.23348
314.265	3945.5	18.9263	1.42757
314.275	3945.68	22.4227	2.54194
314.285	3945.86	21.1239	2.66982
314.295	3946.03	19.1255	2.3351
314.305	3946.2	18.7123	2.109
314.315	3946.36	15.9713	1.90382
314.325	3946.53	12.0173	1.65792
314.335	3946.7	10.4967	1.15658
314.345	3946.88	8.68804	0.78472
314.355	3947.05	6.12651	1.07283
314.365	3947.22	4.59779	1.13775
314.375	3947.39	2.87601	0.97297
314.385	3947.56	2.41128	1.09294
314.395	3947.75	3.30758	0.676718
314.405	3947.93	2.13436	0.77698
314.415	3948.1	1.92252	1.32728
314.425	3948.26	1.78887	1.30804
314.435	3948.43	1.73467	1.07528
314.445	3948.6	2.14318	0.9689
314.455	3948.77	1.25373	0.93684
314.465	3948.94	1.04657	1.21204
314.475	3949.12	2.14221	1.11215
314.485	3949.29	2.50711	1.12229
314.495	3949.46	5.25859	1.33296
314.505	3949.63	6.3672	1.62136
314.515	3949.8	6.71997	1.62179
314.525	3949.99	12.9374	1.80296
314.535	3950.17	34.6441	1.77501
314.545	3950.34	83.0557	1.71715
314.555	3950.5	99.8605	2.14229
314.565	3950.67	68.5396	4.07921
314.575	3950.84	34.1133	7.83882
314.585	3951.01	13.0619	8.0981
314.595	3951.18	5.44034	5.37468
314.605	3951.36	7.32936	2.64807
314.615	3951.53	9.66266	1.60683
314.625	3951.7	9.28791	1.88871
314.635	3951.87	5.35362	3.30283
314.645	3952.05	3.37119	3.35883
314.655	3952.23	2.91621	2.57314
314.665	3952.41	2.4992	2.35047
314.675	3952.57	4.14683	1.86341
314.685	3952.73	6.02577	1.80768
314.695	3952.91	8.18456	1.60115
314.705	3953.08	7.85699	1.29751
314.715	3953.25	2.41681	1.18812
314.725	3953.42	0.104399	1.51223
314.735	3953.6	0.0421874	1.66045
314.745	3953.77	NaN	1.56644
314.755	3953.94	NaN	0.71856
314.765	3954.11	NaN	0.71265
314.775	3954.29	1.58347	1.13471
314.785	3954.47	3.49946	0.73007
314.795	3954.65	2.7088	1.05727
314.805	3954.81	4.43438	1.67577
314.815	3954.97	5.53489	1.95396
314.825	3955.15	5.95207	1.45955
314.835	3955.32	2.12225	1.2627
314.845	3955.49	NaN	1.36019
314.855	3955.66	NaN	0.75573
314.865	3955.84	NaN	0.205125
314.875	3956.01	NaN	NaN
314.885	3956.18	NaN	NaN
314.895	3956.36	0.467857	0.42808
314.905	3956.54	4.31294	0.60655
314.915	3956.71	14.8875	0.75602
314.925	3956.88	23.2213	1.9472
314.935	3957.04	24.591	3.75232
314.945	3957.21	26.346	10.98
314.955	3957.39	33.8892	16.5512
314.965	3957.56	61.0747	17.7908
314.975	3957.73	55.8507	17.4227
314.985	3957.9	28.5858	12.7001
314.995	3958.08	NaN	10.0881
315.005	3958.25	NaN	NaN
315.015	3958.42	NaN	NaN
315.025	3958.6	30.4931	NaN
315.035	3958.78	29.411	3.05011
315.045	3958.96	31.7223	2.50975
315.055	3959.12	40.1341	2.33748
315.065	3959.28	44.692	2.46393
315.075	3959.46	45.6224	2.20654
315.085	3959.63	36.5194	1.74864
315.095	3959.8	25.2001	1.49451
315.105	3959.97	16.0635	1.99946
315.115	3960.15	10.7982	2.07587
315.125	3960.32	6.57303	1.67584
315.135	3960.49	4.64131	1.64503
315.145	3960.67	7.74655	2.00351
315.155	3960.85	13.6111	2.04595
315.165	3961.03	22.6302	2.24798
315.175	3961.19	23.3981	2.17423
315.185	3961.35	15.8986	1.64253
315.195	3961.53	9.86531	1.04221
315.205	3961.7	7.60005	0.39018
315.215	3961.87	6.58049	0.47887
315.225	3962.04	7.02683	0.737717
315.235	3962.22	7.9429	0.7801
315.245	3962.39	8.35107	0.97409
315.255	3962.56	8.08584	1.08879
315.265	3962.74	9.29517	1.21963
315.275	3962.92	17.3904	2.05372
315.285	3963.1	16.6537	2.23519
315.295	3963.27	8.52143	1.41492
315.305	3963.43	3.99607	1.01656
315.315	3963.6	6.13018	0.84177
315.325	3963.77	16.6248	1.71024
315.335	3963.94	24.6372	2.39102
315.345	3964.12	25.7186	2.79365
315.355	3964.29	24.7154	2.59129
315.365	3964.46	29.8689	2.87095
315.375	3964.63	29.5233	2.53271
315.385	3964.81	18.7561	1.74481
315.395	3964.99	9.34677	1.20637
315.405	3965.17	3.93387	0.98762
315.415	3965.34	3.84116	0.60415
315.425	3965.51	9.13997	0.692511
315.435	3965.67	10.125	0.44841
315.445	3965.84	5.52134	0.39487
315.455	3966.01	1.44186	0.54838
315.465	3966.19	0.355938	0.79567
315.475	3966.36	4.14359	1.01065
315.485	3966.53	6.46366	1.08327
315.495	3966.71	3.44766	0.60272
315.505	3966.88	6.74847	0.65923
315.515	3967.05	8.73438	0.58627
315.525	3967.23	2.68942	0.196722
315.535	3967.41	NaN	0.17203
315.545	3967.59	NaN	0.49377
315.555	3967.75	0.2102	0.894822
315.565	3967.91	3.10905	1.04651
315.575	3968.09	3.05268	0.87974
315.585	3968.26	0.85776	0.87478
315.595	3968.43	0.92117	1.19976
315.605	3968.6	9.25689	1.98087
315.615	3968.78	22.5105	3.00138
315.625	3968.95	20.8124	2.87665
315.635	3969.12	10.8269	1.8947
315.645	3969.3	5.36418	1.55481
315.655	3969.48	5.13293	1.36406
315.665	3969.66	11.7624	1.79903
315.675	3969.82	13.1308	1.87598
315.685	3969.98	12.523	1.89891
315.695	3970.16	11.3494	2.75769
315.705	3970.33	14.8944	2.98559
315.715	3970.5	15.2363	2.61507
315.725	3970.67	11.8013	1.61371
315.735	3970.85	7.51215	1.05233
315.745	3971.02	9.26565	2.01138
315.755	3971.19	13.2879	2.01616
315.765	3971.37	14.2785	1.91413
315.775	3971.55	20.7264	2.39771
315.785	3971.73	29.6108	2.66134
315.795	3971.9	22.5167	1.39792
315.805	3972.06	11.4111	0.471567
315.815	3972.23	7.50497	NaN
315.825	3972.4	11.7242	0.38332
315.835	3972.57	11.9261	0.1681
315.845	3972.75	8.65392	NaN
315.855	3972.92	13.6936	0.540744
315.865	3973.09	22.7551	1.5249
315.875	3973.26	26.0635	1.50056
315.885	3973.44	28.6264	1.58297
315.895	3973.62	31.3396	1.20728
315.905	3973.8	30.5809	0.99098
315.915	3973.97	23.6869	1.42279
315.925	3974.14	16.4105	1.6047
315.935	3974.3	10.6424	1.23486
315.945	3974.47	14.2183	0.89348
315.955	3974.64	25.8969	1.28323
315.965	3974.82	30.146	1.73446
315.975	3974.99	29.947	1.2314
315.985	3975.16	28.69	1.55966
315.995	3975.34	NaN	2.3012
316.005	3975.51	NaN	NaN
316.015	3975.68	35.4035	2.4656
316.025	3975.86	33.727	2.17325
316.035	3976.04	27.5259	1.91418
316.045	3976.22	23.1789	1.68599
316.055	3976.38	20.9157	1.34711
316.065	3976.55	16.5977	1.01006
316.075	3976.72	12.0728	0.51003
316.085	3976.89	12.327	0.52089
316.095	3977.06	18.9029	0.39097
316.105	3977.24	58.9835	0.86366
316.115	3977.41	95.2556	2.8068
316.125	3977.58	65.2501	2.23147
316.135	3977.76	37.2417	1.31226
316.145	3977.94	22.631	0.759864
316.155	3978.12	14.261	0.45965
316.165	3978.29	10.877	0.54586
316.175	3978.46	8.36227	0.628422
316.185	3978.62	5.63815	0.33832
316.195	3978.79	4.02013	0.47367
316.205	3978.97	3.394	0.51731
316.215	3979.14	2.99603	0.64938
316.225	3979.31	3.21156	0.48013
316.235	3979.48	3.50663	0.58927
316.245	3979.66	5.32132	1.301
316.255	3979.83	8.72001	1.3414
316.265	3980	10.686	1.49966
316.275	3980.18	10.6027	1.64014
316.285	3980.37	8.15545	1.12861
316.295	3980.54	9.51128	1.08053
316.305	3980.7	16.063	1.36644
316.315	3980.87	17.1705	1.5312
316.325	3981.04	9.68739	1.9875
316.335	3981.21	5.07326	2.89573
316.345	3981.39	3.46663	3.36839
316.355	3981.56	8.76353	3.45788
316.365	3981.73	19.6823	3.78645
316.375	3981.91	21.2297	3.26022
316.385	3982.08	19.1588	2.70126
316.395	3982.26	24.5135	2.09946
316.405	3982.44	29.9029	2.31049
316.415	3982.61	25.3367	1.92512
316.425	3982.78	20.0184	1.54663
316.435	3982.94	16.4226	1.54399
316.445	3983.12	14.5422	1.69573
316.455	3983.29	16.0899	1.592
316.465	3983.46	17.8646	1.43588
316.475	3983.63	19.2877	1.27974
316.485	3983.81	19.0466	0.86818
316.495	3983.98	18.4096	0.68587
316.505	3984.15	18.0113	0.78522
316.515	3984.33	16.1528	1.06797
316.525	3984.51	13.9997	1.02685
316.535	3984.69	8.88565	0.70974
316.545	3984.86	2.77769	NaN
316.555	3985.03	0.951056	0.563656
316.565	3985.19	0.78607	0.76883
316.575	3985.36	2.60384	0.75357
316.585	3985.54	28.5243	0.9119
316.595	3985.71	78.0477	2.94027
316.605	3985.88	79.5721	3.91733
316.615	3986.05	43.0925	2.74926
316.625	3986.23	24.6056	1.91851
316.635	3986.4	20.1584	1.57901
316.645	3986.58	17.8598	1.57009
316.655	3986.76	15.1942	1.99403
316.665	3986.94	10.8969	1.11419
316.675	3987.1	7.43094	1.03557
316.685	3987.27	5.02674	0.69713
316.695	3987.44	6.36349	0.54433
316.705	3987.61	9.36393	0.81727
316.715	3987.78	10.5519	1.4177
316.725	3987.96	9.88832	1.39263
316.735	3988.13	9.16835	0.72566
316.745	3988.3	7.26731	0.32724
316.755	3988.48	6.75316	0.30218
316.765	3988.65	8.78857	0.2097
316.775	3988.83	13.8216	0.140887
316.785	3989.01	18.8498	0.5186
316.795	3989.18	12.4364	0.2272
316.805	3989.35	9.47289	0.234288
316.815	3989.51	15.0977	0.76097
316.825	3989.69	12.3198	0.428837
316.835	3989.86	10.8609	0.016
316.845	3990.03	14.9959	0.21422
316.855	3990.2	11.0142	0.0884375
316.865	3990.38	7.74199	0.173233
316.875	3990.55	6.53166	0.110129
316.885	3990.72	9.67954	0.62163
316.895	3990.9	16.3757	1.22338
316.905	3991.09	19.924	1.51491
316.915	3991.26	21.5777	1.83377
316.925	3991.42	20.9064	1.43533
316.935	3991.59	16.5052	0.75197
316.945	3991.76	18.513	0.7695
316.955	3991.93	20.8622	1.90053
316.965	3992.11	12.1049	1.01745
316.975	3992.28	7.8378	0.35379
316.985	3992.45	7.27541	1.06893
316.995	3992.62	7.03884	1.98016
317.005	3992.8	NaN	NaN
317.015	3992.97	31.964	NaN
317.025	3993.15	71.757	NaN
317.035	3993.34	115.466	NaN
317.045	3993.51	127.606	NaN
317.055	3993.68	94.6507	NaN
317.065	3993.84	52.9012	NaN
317.075	3994.02	28.5744	NaN
317.085	3994.19	16.6188	NaN
317.095	3994.36	12.2719	NaN
317.105	3994.54	15.7623	NaN
317.115	3994.71	18.3788	NaN
317.125	3994.89	20.6197	NaN
317.135	3995.06	20.8056	NaN
317.145	3995.24	18.897	NaN
317.155	3995.42	15.8333	NaN
317.165	3995.6	16.3559	NaN
317.175	3995.76	13.8734	NaN
317.185	3995.93	7.65843	NaN
317.195	3996.1	4.63324	NaN
317.205	3996.28	10.7627	NaN
317.215	3996.45	15.6608	NaN
317.225	3996.62	12.0358	NaN
317.235	3996.8	8.52671	NaN
317.245	3996.97	4.70184	NaN
317.255	3997.15	4.29591	NaN
317.265	3997.32	10.6213	NaN
317.275	3997.5	14.9658	NaN
317.285	3997.68	17.2595	NaN
317.295	3997.86	14.4824	NaN
317.305	3998.02	11.0899	NaN
317.315	3998.19	6.02402	NaN
317.325	3998.36	1.79113	NaN
317.335	3998.54	NaN	NaN
317.345	3998.71	NaN	NaN
317.355	3998.88	5.56554	NaN
317.365	3999.06	13.4388	NaN
317.375	3999.23	12.4263	NaN
317.385	3999.41	12.4666	NaN
317.395	3999.59	17.8323	NaN
317.405	3999.77	15.665	NaN
317.415	3999.95	11.2095	NaN
317.425	4000.11	8.66312	NaN
317.435	4000.28	8.6314	NaN
317.445	4000.45	7.94887	NaN
317.455	4000.62	5.07848	NaN
317.465	4000.8	3.39743	NaN
317.475	4000.97	10.8593	NaN
317.485	4001.15	16.6497	NaN
317.495	4001.32	13.7158	NaN
317.505	4001.49	11.6201	NaN
317.515	4001.67	11.9535	NaN
317.525	4001.85	10.2896	NaN
317.535	4002.03	10.0803	NaN
317.545	4002.21	14.7462	NaN
317.555	4002.37	19.1273	NaN
317.565	4002.54	16.8266	NaN
317.575	4002.71	11.9997	NaN
317.585	4002.88	8.18685	NaN
317.595	4003.06	11.0314	NaN
317.605	4003.23	11.6392	NaN
317.615	4003.41	12.6234	NaN
317.625	4003.58	23.7197	NaN
317.635	4003.75	29.8392	NaN
317.645	4003.94	27.9009	NaN
317.655	4004.12	24.1778	NaN
317.665	4004.29	22.0698	NaN
317.675	4004.46	18.7627	NaN
317.685	4004.62	13.9416	NaN
317.695	4004.8	11.0697	NaN
317.705	4004.97	10.9038	NaN
317.715	4005.15	10.3908	NaN
317.725	4005.32	10.2964	NaN
317.735	4005.49	9.69755	NaN
317.745	4005.67	8.96434	NaN
317.755	4005.84	9.60406	NaN
317.765	4006.01	9.02484	NaN
317.775	4006.2	9.44815	NaN
317.785	4006.38	12.5677	NaN
317.795	4006.55	16.2467	NaN
317.805	4006.72	23.3739	NaN
317.815	4006.88	28.5298	NaN
317.825	4007.06	32.2796	NaN
317.835	4007.23	34.9103	NaN
317.845	4007.41	32.4618	NaN
317.855	4007.58	26.0804	NaN
317.865	4007.75	20.0715	NaN
317.875	4007.93	17.0922	NaN
317.885	4008.1	17.5135	NaN
317.895	4008.28	16.3101	NaN
317.905	4008.47	12.6297	NaN
317.915	4008.64	6.74168	NaN
317.925	4008.81	2.18352	NaN
317.935	4008.97	0.42886	NaN
317.945	4009.14	0.75463	NaN
317.955	4009.32	2.41145	NaN
317.965	4009.49	1.11229	NaN
317.975	4009.67	2.98302	NaN
317.985	4009.84	7.02773	NaN
317.995	4010.01	9.37303	NaN
318.005	4010.19	7.7767	NaN
318.015	4010.38	9.23469	2.74523
318.025	4010.57	10.3173	2.31327
318.035	4010.77	9.9289	2.37422
318.045	4010.95	11.2364	2.66305
318.055	4011.13	17.9319	3.03649
318.065	4011.3	21.0996	4.9113
318.075	4011.49	15.6037	4.0441
318.085	4011.67	11.8199	2.21403
318.095	4011.86	10.981	1.97884
318.105	4012.04	10.9317	2.04821
318.115	4012.23	16.3292	1.86544
318.125	4012.41	19.6023	3.08111
318.135	4012.6	14.8416	2.86562
318.145	4012.79	7.88327	1.68333
318.155	4012.99	3.53053	1.07525
318.165	4013.17	3.51423	0.85641
318.175	4013.35	13.0125	0.876078
318.185	4013.52	35.9369	1.89932
318.195	4013.71	55.176	2.49597
318.205	4013.89	64.0291	2.72251
318.215	4014.08	54.4011	3.15214
318.225	4014.26	32.8327	2.64186
318.235	4014.45	18.9573	1.85647
318.245	4014.63	15.9923	1.64094
318.255	4014.82	15.7344	1.91985
318.265	4015	11.9689	1.8189
318.275	4015.2	6.19166	1.25241
318.285	4015.39	7.45211	0.75865
318.295	4015.58	14.099	1.44373
318.305	4015.75	15.9586	2.00196
318.315	4015.93	15.4932	1.98556
318.325	4016.11	15.2749	1.81581
318.335	4016.3	15.4197	1.84585
318.345	4016.48	14.5489	1.95118
318.355	4016.67	10.7788	2.12528
318.365	4016.85	6.79032	1.52655
318.375	4017.04	10.6363	0.77383
318.385	4017.22	17.5922	0.93159
318.395	4017.42	22.2314	1.18422
318.405	4017.61	24.2248	1.64317
318.415	4017.8	23.272	1.43739
318.425	4017.97	15.6411	1.29249
318.435	4018.15	13.1118	0.99988
318.445	4018.33	21.4912	1.43603
318.455	4018.52	26.532	2.15378
318.465	4018.7	26.4475	2.88799
318.475	4018.89	36.4587	2.89837
318.485	4019.07	30.0817	3.16418
318.495	4019.26	15.9863	1.99555
318.505	4019.44	7.85932	1.29194
318.515	4019.63	2.65571	0.68334
318.525	4019.82	1.44296	0.458018
318.535	4020.02	5.50733	0.8118
318.545	4020.2	13.5636	1.22173
318.555	4020.38	19.6	1.60636
318.565	4020.55	22.0494	1.83873
318.575	4020.74	22.5008	1.90144
318.585	4020.92	22.5391	2.29163
318.595	4021.11	19.9614	2.19708
318.605	4021.29	18.0638	2.11895
318.615	4021.48	17.8769	2.83009
318.625	4021.66	16.8134	2.59803
318.635	4021.85	16.4268	2.1924
318.645	4022.04	15.6045	2.31505
318.655	4022.24	15.3299	2.57282
318.665	4022.42	14.9435	2.22926
318.675	4022.6	11.224	2.30366
318.685	4022.77	7.48699	2.20739
318.695	4022.96	5.34252	1.35953
318.705	4023.14	2.46807	1.38613
318.715	4023.33	1.26266	1.30787
318.725	4023.51	0.610075	0.99054
318.735	4023.7	NaN	1.53777
318.745	4023.88	NaN	1.59704
318.755	4024.07	NaN	1.45974
318.765	4024.25	NaN	1.25699
318.775	4024.45	1.95718	0.442873
318.785	4024.64	11.56	0.55321
318.795	4024.83	17.017	1.57861
318.805	4025	13.2172	1.12276
318.815	4025.18	11.3475	0.58716
318.825	4025.36	10.408	0.31886
318.835	4025.55	9.39921	0.25692
318.845	4025.73	11.3114	0.31614
318.855	4025.92	10.1143	1.07625
318.865	4026.1	9.10938	0.98492
318.875	4026.29	6.46226	1.1195
318.885	4026.47	3.70573	0.75623
318.895	4026.67	4.35466	0.490509
318.905	4026.86	6.77566	0.54028
318.915	4027.05	9.53781	0.88768
318.925	4027.22	11.2607	0.977611
318.935	4027.4	12.8761	1.53368
318.945	4027.58	13.009	1.69112
318.955	4027.77	13.8875	1.29839
318.965	4027.95	19.6119	1.74069
318.975	4028.14	30.1041	1.97668
318.985	4028.32	36.8364	2.14389
318.995	4028.51	35.8624	2.64985
319.005	4028.69	NaN	NaN
319.015	4028.88	16.4555	1.69814
319.025	4029.07	30.1627	1.22022
319.035	4029.27	34.6154	2.35246
319.045	4029.45	30.7582	1.88991
319.055	4029.63	23.7691	1.67462
319.065	4029.8	15.3172	0.84983
319.075	4029.99	8.89757	0.35452
319.085	4030.17	8.32244	0.62559
319.095	4030.36	9.75537	0.77879
319.105	4030.54	10.5746	0.51273
319.115	4030.73	10.885	0.67252
319.125	4030.91	11.9604	0.2592
319.135	4031.1	16.3449	0.28799
319.145	4031.29	19.6182	0.6223
319.155	4031.49	19.85	0.74525
319.165	4031.67	20.0463	0.67904
319.175	4031.85	14.9326	0.969989
319.185	4032.03	9.70286	0.74937
319.195	4032.21	7.35275	0.95496
319.205	4032.4	4.34451	0.89202
319.215	4032.58	3.57745	0.49165
319.225	4032.77	4.72558	0.666875
319.235	4032.95	6.57894	0.58676
319.245	4033.14	7.46148	0.74322
319.255	4033.32	9.63778	1.19772
319.265	4033.51	13.1804	1.68173
319.275	4033.7	13.8439	1.91306
319.285	4033.89	14.1847	1.78205
319.295	4034.08	14.3328	1.7846
319.305	4034.26	7.74828	1.35431
319.315	4034.43	5.0159	0.73812
319.325	4034.62	11.0049	0.63915
319.335	4034.8	11.2267	0.25527
319.345	4034.99	9.45426	0.102117
319.355	4035.17	17.4109	0.15897
319.365	4035.36	25.0627	0.4039
319.375	4035.54	29.6334	0.9534
319.385	4035.73	33.3729	1.35224
319.395	4035.92	32.0895	1.2084
319.405	4036.12	29.7606	1.83905
319.415	4036.3	18.4324	2.56542
319.425	4036.48	14.9999	2.60067
319.435	4036.65	19.1467	3.12714
319.445	4036.84	14.4103	3.52931
319.455	4037.02	7.94274	3.58429
319.465	4037.21	4.17963	3.28883
319.475	4037.39	4.7269	3.18007
319.485	4037.58	13.4027	3.57563
319.495	4037.76	15.3164	3.15252
319.505	4037.95	10.8485	2.7425
319.515	4038.13	11.3256	2.8237
319.525	4038.33	19.9819	2.54035
319.535	4038.52	24.6657	2.56396
319.545	4038.71	25.2671	2.85141
319.555	4038.88	23.764	2.75082
319.565	4039.06	25.6832	2.59431
319.575	4039.24	29.5567	2.98994
319.585	4039.43	25.0195	3.3561
319.595	4039.61	22.6398	3.32925
319.605	4039.8	21.0388	3.32532
319.615	4039.98	19.46	2.93822
319.625	4040.17	18.4758	2.82289
319.635	4040.35	17.6998	2.73705
319.645	4040.55	19.4109	2.80678
319.655	4040.74	22.9977	3.04061
319.665	4040.93	17.3685	3.15134
319.675	4041.1	12.3376	2.82233
319.685	4041.28	11.0426	2.61274
319.695	4041.47	10.8712	2.67431
319.705	4041.65	11.5785	2.41164
319.715	4041.84	11.2393	2.2898
319.725	4042.02	11.5477	2.52825
319.735	4042.21	11.7136	2.6947
319.745	4042.39	10.9172	2.51071
319.755	4042.58	11.1776	2.35622
319.765	4042.76	10.7833	2.47683
319.775	4042.96	11.0209	2.29353
319.785	4043.15	11.6146	1.97478
319.795	4043.33	13.4749	2.26892
319.805	4043.51	14.378	2.36937
319.815	4043.69	16.0286	1.9138
319.825	4043.87	21.7685	2.69273
319.835	4044.06	31.6453	2.99347
319.845	4044.24	43.5469	3.55294
319.855	4044.43	46.4757	4.48574
319.865	4044.61	39.2527	4.61944
319.875	4044.8	32.3604	3.98025
319.885	4044.98	29.8504	3.44588
319.895	4045.18	23.9031	3.27578
319.905	4045.37	14.2633	3.07505
319.915	4045.56	11.4054	2.96648
319.925	4045.73	11.5182	2.44223
319.935	4045.91	10.6972	2.15955
319.945	4046.09	10.6524	1.91995
319.955	4046.28	9.18433	2.08963
319.965	4046.46	7.42276	1.91551
319.975	4046.65	5.14251	1.43685
319.985	4046.83	3.31574	1.75072
319.995	4047.02	3.5909	NaN
320.005	4047.2	NaN	NaN
320.015	4047.39	12.4496	2.71937
320.025	4047.58	17.984	2.20019
320.035	4047.78	29.2623	2.83478
320.045	4047.96	40.0883	3.07755
320.055	4048.14	40.0949	3.03572
320.065	4048.32	29.0766	3.92979
320.075	4048.5	20.9313	3.91056
320.085	4048.69	26.4583	3.9601
320.095	4048.87	32.7804	3.44961
320.105	4049.06	30.9877	3.37797
320.115	4049.24	31.5727	3.51591
320.125	4049.43	30.9414	3.09057
320.135	4049.61	24.1481	3.31367
320.145	4049.81	19.753	3.36325
320.155	4050	17.4452	2.48923
320.165	4050.19	16.5785	1.45146
320.175	4050.36	17.2918	1.14838
320.185	4050.54	16.4673	1.37365
320.195	4050.72	13.0244	1.33475
320.205	4050.91	9.67197	1.37445
320.215	4051.09	6.98488	1.30611
320.225	4051.28	6.62243	0.71375
320.235	4051.47	10.9987	0.81567
320.245	4051.65	26.3156	0.76695
320.255	4051.84	42.8369	0.80013
320.265	4052.02	47.7548	1.97953
320.275	4052.22	32.8959	3.05596
320.285	4052.41	21.6262	3.47381
320.295	4052.6	17.9219	2.65874
320.305	4052.77	18.7907	2.22358
320.315	4052.95	18.2078	1.98817
320.325	4053.13	15.4669	1.75605
320.335	4053.32	13.3331	1.46826
320.345	4053.5	11.7067	1.31804
320.355	4053.69	8.55785	1.79007
320.365	4053.87	7.04269	1.60709
320.375	4054.06	6.62074	1.38482
320.385	4054.24	5.42837	1.64724
320.395	4054.44	6.10184	1.8211
320.405	4054.63	10.2589	1.73622
320.415	4054.82	17.8373	1.32396
320.425	4055	17.7066	1.82798
320.435	4055.17	13.121	2.65769
320.445	4055.36	10.2181	2.19962
320.455	4055.54	9.50649	1.13895
320.465	4055.73	10.8651	1.15248
320.475	4055.91	11.2019	1.34286
320.485	4056.1	13.6858	2.17512
320.495	4056.28	22.3064	2.40479
320.505	4056.47	17.5986	2.39869
320.515	4056.65	11.5624	2.83141
320.525	4056.85	13.3405	2.03308
320.535	4057.04	17.9316	1.47322
320.545	4057.23	20.4963	1.97801
320.555	4057.4	22.4489	2.34301
320.565	4057.58	26.5685	2.37837
320.575	4057.77	21.5891	2.42137
320.585	4057.95	10.6391	3.41088
320.595	4058.14	6.13117	3.59471
320.605	4058.32	6.19949	2.5799
320.615	4058.51	8.13274	1.83037
320.625	4058.69	11.7217	2.25329
320.635	4058.88	16.0373	2.44368
320.645	4059.07	19.6602	2.68738
320.655	4059.27	17.643	4.75023
320.665	4059.45	12.379	5.85107
320.675	4059.63	12.7023	5.19759
320.685	4059.8	14.4111	5.57028
320.695	4059.99	12.0659	6.4812
320.705	4060.17	13.0509	3.74701
320.715	4060.36	13.3463	2.10666
320.725	4060.54	10.0277	1.63554
320.735	4060.73	5.9653	1.00063
320.745	4060.92	5.18412	0.68342
320.755	4061.1	10.7491	0.31705
320.765	4061.29	11.3417	0.61555
320.775	4061.48	9.78734	1.35052
320.785	4061.68	12.5798	1.55311
320.795	4061.86	12.635	2.01534
320.805	4062.04	13.4424	2.61614
320.815	4062.21	10.911	3.18863
320.825	4062.4	11.9529	3.15959
320.835	4062.58	17.0086	2.52467
320.845	4062.77	14.488	2.46946
320.855	4062.95	10.497	2.32906
320.865	4063.14	8.01081	1.9365
320.875	4063.32	8.06222	1.97951
320.885	4063.51	18.4555	2.05202
320.895	4063.7	26.1308	2.14476
320.905	4063.9	20.8152	2.67193
320.915	4064.08	12.4829	3.3896
320.925	4064.26	9.07661	2.71247
320.935	4064.44	6.77157	2.19181
320.945	4064.62	9.12199	1.94009
320.955	4064.81	20.2636	1.86521
320.965	4064.99	25.3301	1.70519
320.975	4065.18	27.9887	2.19692
320.985	4065.36	20.491	2.66571
320.995	4065.55	10.0125	2.4417
321.005	4065.73	NaN	1.899
321.015	4065.92	5.84668	1.59821
321.025	4066.11	5.82485	1.08495
321.035	4066.31	6.77625	0.89931
321.045	4066.49	8.19798	0.90104
321.055	4066.67	13.4022	1.03777
321.065	4066.85	19.8614	1.3959
321.075	4067.03	19.2342	1.71388
321.085	4067.22	12.8376	1.22677
321.095	4067.4	11.6547	1.23805
321.105	4067.59	17.8679	1.28136
321.115	4067.78	20.8268	1.61858
321.125	4067.96	15.5597	1.55641
321.135	4068.15	10.8523	1.18436
321.145	4068.34	9.37023	0.940555
321.155	4068.54	7.49266	1.07955
321.165	4068.72	7.42293	0.86403
321.175	4068.9	8.22433	0.638667
321.185	4069.07	8.33196	0.6722
321.195	4069.26	20.9142	1.20758
321.205	4069.45	43.1218	3.58005
321.215	4069.63	43.4948	5.20489
321.225	4069.82	31.3295	4.33756
321.235	4070	23.2063	2.72265
321.245	4070.19	23.3154	2.18443
321.255	4070.37	24.7438	2.05205
321.265	4070.56	23.3133	2.09544
321.275	4070.75	15.8813	1.5802
321.285	4070.95	9.52618	0.84073
321.295	4071.13	7.05342	1.0471
321.305	4071.31	6.41714	1.19699
321.315	4071.49	6.65374	1.02776
321.325	4071.67	8.72735	1.30113
321.335	4071.86	20.7997	1.93878
321.345	4072.04	39.334	3.08452
321.355	4072.23	62.5229	4.04494
321.365	4072.42	68.632	4.19699
321.375	4072.6	59.1741	3.71001
321.385	4072.79	54.2991	3.65744
321.395	4072.98	45.9919	3.68248
321.405	4073.18	34.6219	2.85333
321.415	4073.36	34.0266	2.96709
321.425	4073.54	31.9594	3.07886
321.435	4073.71	50.2254	2.63177
321.445	4073.9	151.509	3.65605
321.455	4074.09	313.863	7.7284
321.465	4074.27	470.325	10.7623
321.475	4074.46	498.168	12.1636
321.485	4074.64	257.319	11.3891
321.495	4074.83	105.987	7.41647
321.505	4075.01	49.7725	3.97421
321.515	4075.2	27.2755	2.6598
321.525	4075.39	17.6822	2.94435
321.535	4075.59	12.313	2.8016
321.545	4075.77	6.83851	1.66599
321.555	4075.95	6.14739	1.41627
321.565	4076.13	9.34095	1.57028
321.575	4076.31	7.614	1.66168
321.585	4076.5	4.64191	1.60945
321.595	4076.68	4.96348	1.61147
321.605	4076.87	7.79348	2.33548
321.615	4077.06	11.3034	2.78476
321.625	4077.24	9.94651	2.44166
321.635	4077.43	8.43157	1.74067
321.645	4077.62	6.98784	1.13268
321.655	4077.82	5.92107	1.02639
321.665	4078	8.06233	1.19471
321.675	4078.18	6.81691	1.32262
321.685	4078.35	6.53068	1.32312
321.695	4078.54	7.20241	1.22944
321.705	4078.73	7.0334	1.20603
321.715	4078.91	7.66893	1.07721
321.725	4079.1	8.90094	0.91325
321.735	4079.28	9.26748	0.96018
321.745	4079.47	6.37645	0.66538
321.755	4079.65	4.24512	0.46631
321.765	4079.84	4.97477	0.7018
321.775	4080.03	7.08315	0.723418
321.785	4080.23	11.5286	1.40008
321.795	4080.41	13.9361	3.13393
321.805	4080.59	15.8121	3.43407
321.815	4080.77	18.2336	2.59802
321.825	4080.95	18.1419	2.24578
321.835	4081.14	16.9697	2.2577
321.845	4081.32	15.3638	2.17385
321.855	4081.51	13.223	2.10265
321.865	4081.7	11.8251	1.85573
321.875	4081.88	7.6232	1.68538
321.885	4082.07	4.97388	1.22748
321.895	4082.26	4.62386	1.09414
321.905	4082.46	3.53539	0.85251
321.915	4082.64	3.81379	0.70158
321.925	4082.82	7.21974	0.699444
321.935	4082.99	13.1894	1.03171
321.945	4083.18	13.0041	1.16831
321.955	4083.37	22.4033	1.46779
321.965	4083.55	22.9406	2.59483
321.975	4083.74	15.7505	2.04449
321.985	4083.92	12.4749	2.07894
321.995	4084.11	13.2713	1.84648
322.005	4084.29	NaN	NaN
322.015	4084.48	6.98657	1.9328
322.025	4084.67	6.90542	1.27578
322.035	4084.87	12.8148	1.08092
322.045	4085.06	20.4996	1.95978
322.055	4085.23	20.0639	1.69286
322.065	4085.41	15.598	1.23843
322.075	4085.59	12.7141	0.93826
322.085	4085.78	12.6264	0.89371
322.095	4085.97	13.0259	0.98004
322.105	4086.15	12.4926	0.92591
322.115	4086.34	13.3989	0.92926
322.125	4086.52	13.4476	0.84313
322.135	4086.71	12.7249	0.85286
322.145	4086.9	13.4273	0.864791
322.155	4087.1	12.6018	0.78566
322.165	4087.28	12.3211	0.67704
322.175	4087.46	13.3292	0.967256
322.185	4087.64	10.1839	1.05112
322.195	4087.82	6.51344	0.92963
322.205	4088.01	4.7211	0.91354
322.215	4088.2	7.66807	0.98689
322.225	4088.38	17.5666	1.55567
322.235	4088.57	17.2406	1.8465
322.245	4088.75	14.0126	1.37367
322.255	4088.94	14.9933	1.06705
322.265	4089.12	13.8534	1.04799
322.275	4089.32	12.6709	1.09355
322.285	4089.51	11.6331	0.85949
322.295	4089.7	8.54553	0.61051
322.305	4089.88	7.47997	0.61495
322.315	4090.05	7.11076	0.67353
322.325	4090.24	4.7886	0.63853
322.335	4090.43	4.34138	0.52365
322.345	4090.61	7.98109	0.95504
322.355	4090.8	8.9128	1.20756
322.365	4090.98	10.4608	1.91379
322.375	4091.17	12.3828	1.84043
322.385	4091.35	11.5428	1.77671
322.395	4091.55	11.2823	1.65703
322.405	4091.74	11.3644	1.53703
322.415	4091.93	11.8536	1.45721
322.425	4092.11	16.53	1.5657
322.435	4092.28	16.9615	1.32026
322.445	4092.47	13.1697	1.10307
322.455	4092.65	11.7397	0.98811
322.465	4092.84	10.361	0.80613
322.475	4093.03	8.84094	0.4356
322.485	4093.21	9.56852	0.39094
322.495	4093.4	9.35553	0.36859
322.505	4093.58	9.36356	0.42611
322.515	4093.77	10.1972	0.46133
322.525	4093.96	10.3536	0.532918
322.535	4094.16	11.1882	0.78696
322.545	4094.35	13.7055	1.0203
322.555	4094.52	13.9154	1.47524
322.565	4094.7	17.0909	1.88009
322.575	4094.88	12.4909	1.43598
322.585	4095.07	7.48474	1.43274
322.595	4095.26	6.60627	1.03011
322.605	4095.44	4.72382	0.6499
322.615	4095.63	5.04638	0.76487
322.625	4095.81	7.65207	0.65942
322.635	4096	17.1993	1.21845
322.645	4096.19	20.588	1.37154
322.655	4096.39	11.8515	0.61395
322.665	4096.57	6.9117	0.67443
322.675	4096.75	4.12054	0.285633
322.685	4096.93	1.50539	0.28441
322.695	4097.11	2.39178	0.129878
322.705	4097.3	1.1447	0.232233
322.715	4097.49	3.39996	0.53904
322.725	4097.67	4.72382	0.50981
322.735	4097.86	6.76461	0.27402
322.745	4098.04	5.77582	0.3877
322.755	4098.23	7.44997	0.21185
322.765	4098.41	19.7726	0.72932
322.775	4098.61	20.5974	0.757173
322.785	4098.8	13.2613	0.131914
322.795	4098.99	10.5898	0.0785
322.805	4099.17	9.73059	0.152167
322.815	4099.34	9.64622	0.48266
322.825	4099.53	9.07936	0.55919
322.835	4099.72	9.30699	0.90404
322.845	4099.9	11.3042	0.89747
322.855	4100.09	9.17018	0.70882
322.865	4100.27	5.65129	0.237567
322.875	4100.46	3.77905	NaN
322.885	4100.64	2.52975	0.0422
322.895	4100.84	4.7084	0.362582
322.905	4101.03	5.71654	0.60533
322.915	4101.22	9.2293	0.80639
322.925	4101.4	14.9381	1.04171
322.935	4101.57	15.8927	0.94373
322.945	4101.76	16.5194	0.85091
322.955	4101.94	11.9668	0.81557
322.965	4102.13	5.15727	0.60129
322.975	4102.32	6.79104	0.68412
322.985	4102.5	11.3096	1.02868
322.995	4102.69	NaN	NaN
323.005	4102.87	NaN	NaN
323.015	4103.06	14.43	NaN
323.025	4103.25	15.0048	1.7489
323.035	4103.44	11.2299	1.16584
323.045	4103.63	7.93316	0.65053
323.055	4103.8	7.04	1.05613
323.065	4103.98	7.73666	1.10249
323.075	4104.16	10.286	1.02806
323.085	4104.35	11.7528	0.74597
323.095	4104.53	16.1911	1.00383
323.105	4104.71	22.2705	1.90066
323.115	4104.9	18.2634	1.98282
323.125	4105.08	13.5977	1.79975
323.135	4105.27	15.1035	1.87869
323.145	4105.46	24.8848	2.9315
323.155	4105.65	21.7321	2.80968
323.165	4105.84	18.7967	2.01637
323.175	4106.01	31.4114	2.44006
323.185	4106.19	33.8969	2.35005
323.195	4106.37	29.3046	2.13185
323.205	4106.56	22.9868	2.13728
323.215	4106.74	19.4779	2.2482
323.225	4106.93	20.628	1.88939
323.235	4107.11	20.2403	1.85332
323.245	4107.29	18.9157	2.18141
323.255	4107.48	19.6201	2.04625
323.265	4107.66	18.718	1.91112
323.275	4107.86	18.2323	2.00419
323.285	4108.05	20.129	1.88987
323.295	4108.23	24.2533	2.1062
323.305	4108.41	26.2579	2.10813
323.315	4108.58	20.8736	1.44942
323.325	4108.77	15.8046	1.39092
323.335	4108.95	20.605	1.86281
323.345	4109.14	18.4867	1.64134
323.355	4109.32	10.289	1.43269
323.365	4109.5	4.33172	1.53079
323.375	4109.69	0.77112	1.6448
323.385	4109.87	5.61079	1.95055
323.395	4110.07	11.3503	1.86179
323.405	4110.26	9.90004	1.52357
323.415	4110.44	13.8316	1.72068
323.425	4110.62	15.0909	2.13189
323.435	4110.79	15.1664	2.00952
323.445	4110.98	15.5827	1.82961
323.455	4111.16	13.7107	2.18325
323.465	4111.35	9.38029	2.01292
323.475	4111.53	6.42209	1.87454
323.485	4111.71	17.8291	2.28888
323.495	4111.9	42.1643	2.96841
323.505	4112.08	58.2992	3.56484
323.515	4112.27	66.2439	3.78745
323.525	4112.46	54.1155	3.79772
323.535	4112.65	35.5244	3.45937
323.545	4112.84	19.6664	3.01745
323.555	4113.01	10.8283	2.82161
323.565	4113.19	7.36033	2.91008
323.575	4113.37	4.29469	2.94418
323.585	4113.56	4.24851	2.50224
323.595	4113.74	6.04246	2.60982
323.605	4113.92	11.042	2.41387
323.615	4114.11	16.3351	2.42881
323.625	4114.29	18.7096	2.71214
323.635	4114.48	17.1111	2.89322
323.645	4114.67	9.81633	2.60022
323.655	4114.86	4.47442	2.07949
323.665	4115.05	1.88357	1.72059
323.675	4115.22	4.68536	1.92514
323.685	4115.4	10.8366	2.25533
323.695	4115.58	13.1446	2.81022
323.705	4115.77	14.7727	2.40979
323.715	4115.95	14.5022	2.48861
323.725	4116.14	16.9618	2.50671
323.735	4116.32	24.352	2.88904
323.745	4116.5	23.1704	3.31609
323.755	4116.69	20.002	3.40131
323.765	4116.87	15.9626	3.40983
323.775	4117.07	11.8342	2.85657
323.785	4117.26	6.37415	1.85808
323.795	4117.44	4.69997	1.70686
323.805	4117.62	2.55029	1.83687
323.815	4117.79	2.42742	1.59622
323.825	4117.98	1.43854	1.5153
323.835	4118.16	NaN	1.38644
323.845	4118.35	NaN	1.54831
323.855	4118.53	0.31545	1.63675
323.865	4118.71	2.16803	1.60052
323.875	4118.9	9.42839	2.09151
323.885	4119.08	21.3248	2.27576
323.895	4119.28	21.6119	2.4431
323.905	4119.47	16.8184	2.32463
323.915	4119.65	13.3314	2.61112
323.925	4119.83	12.6787	2.63356
323.935	4120	13.3432	2.6155
323.945	4120.19	22.0779	3.43242
323.955	4120.37	32.4216	3.33552
323.965	4120.56	25.3225	2.48461
323.975	4120.74	14.6832	1.67207
323.985	4120.92	9.07933	1.76366
323.995	4121.11	6.72555	1.8174
324.005	4121.29	NaN	NaN
324.015	4121.45	10.7822	3.13134
324.025	4121.63	18.219	3.92797
324.035	4121.81	19.6228	3.73799
324.045	4121.98	22.755	3.93246
324.055	4122.14	28.503	3.63624
324.065	4122.3	24.476	2.77137
324.075	4122.47	17.1678	2.07587
324.085	4122.63	9.43185	1.34256
324.095	4122.8	4.86027	1.14071
324.105	4122.97	3.24992	1.31624
324.115	4123.14	1.52144	1.11133
324.125	4123.31	2.00507	0.86862
324.135	4123.48	3.35338	0.81466
324.145	4123.65	14.0405	1.27085
324.155	4123.83	22.5482	1.47686
324.165	4124	21.9378	1.37573
324.175	4124.16	24.0326	1.61084
324.185	4124.32	21.8857	2.27122
324.195	4124.49	15.8004	2.35556
324.205	4124.66	13.7717	2.23235
324.215	4124.83	10.8154	1.87957
324.225	4125	9.69905	1.79729
324.235	4125.16	8.90657	1.80926
324.245	4125.33	7.32228	1.35261
324.255	4125.5	7.27977	1.10986
324.265	4125.67	7.62552	0.70986
324.275	4125.85	11.4431	1.08536
324.285	4126.02	13.7747	1.26192
324.295	4126.19	15.5859	0.99409
324.305	4126.35	16.9235	1.2412
324.315	4126.51	17.1908	1.64725
324.325	4126.68	16.5792	1.77656
324.335	4126.85	15.4006	1.79356
324.345	4127.02	12.3333	1.35896
324.355	4127.19	7.94443	1.57854
324.365	4127.36	14.4429	1.2572
324.375	4127.52	33.6071	1.97053
324.385	4127.69	39.4125	2.69024
324.395	4127.87	26.1983	1.5725
324.405	4128.05	10.0512	0.83637
324.415	4128.22	4.35353	0.38608
324.425	4128.38	8.29373	0.807789
324.435	4128.54	9.8912	1.30361
324.445	4128.7	9.19576	0.99479
324.455	4128.87	4.33908	0.74894
324.465	4129.04	1.36658	0.80814
324.475	4129.21	3.65837	0.65037
324.485	4129.38	13.5813	0.99886
324.495	4129.55	16.3744	0.94475
324.505	4129.72	11.2518	0.93469
324.515	4129.88	11.4427	1.04416
324.525	4130.06	15.5488	1.21801
324.535	4130.24	17.3586	1.17459
324.545	4130.41	21.3554	1.07339
324.555	4130.57	26.6734	1.56642
324.565	4130.73	23.7651	1.30527
324.575	4130.9	16.7783	0.68193
324.585	4131.06	11.0268	0.41696
324.595	4131.23	53.5643	1.59566
324.605	4131.4	131.277	4.22109
324.615	4131.57	161.152	5.63567
324.625	4131.74	153.98	5.61621
324.635	4131.91	114.645	5.16584
324.645	4132.08	63.056	3.12247
324.655	4132.26	33.03	1.39007
324.665	4132.43	21.6157	0.77291
324.675	4132.59	18.6978	0.535144
324.685	4132.75	14.638	0.65551
324.695	4132.92	11.1716	0.74597
324.705	4133.09	12.7316	0.98754
324.715	4133.26	17.2399	1.69761
324.725	4133.43	22.6468	2.5146
324.735	4133.59	23.4638	2.49818
324.745	4133.76	23.1866	1.62934
324.755	4133.93	43.3963	1.88021
324.765	4134.1	58.5908	3.70981
324.775	4134.28	36.6936	2.05717
324.785	4134.45	21.9813	1.51905
324.795	4134.62	13.4921	1.55925
324.805	4134.78	9.1826	1.1558
324.815	4134.94	8.59224	1.28134
324.825	4135.11	10.6627	1.11392
324.835	4135.28	13.6204	0.60679
324.845	4135.45	11.4457	0.65635
324.855	4135.62	10.6716	0.64926
324.865	4135.79	12.4462	0.59505
324.875	4135.95	14.0324	0.51882
324.885	4136.12	10.2105	0.48343
324.895	4136.3	6.43958	0.452127
324.905	4136.48	10.4287	0.63233
324.915	4136.65	9.54719	0.38621
324.925	4136.81	8.17041	0.245456
[truncated: 110,965 more rows]

## Sheet: TALDICE_100yr_fluxes
TALDICE 100yr mean fluxes
Column 1: Depth from top (m)
Column 2: AICC2012 ice age (yrs BP, i.e. before 1950 AD)
Column 3: Na flux (ug/m^2/a)
Column 4: Ca flux (ug/m^2/a)
Depth	Ice age (AICC2012)	J_ssNa	J_ssCa
(m)	(a BP, i.e. before 1950 AD)	(ug/m^2/a)	(ug/m^2/a)
131.619	1249.85	NaN	NaN
139.488	1350.46	NaN	NaN
147.277	1449.07	NaN	NaN
154.929	1549.85	NaN	NaN
162.262	1650.39	NaN	NaN
169.658	1749.91	NaN	NaN
177.096	1850.05	NaN	NaN
184.391	1948.49	NaN	NaN
191.392	2051.14	NaN	NaN
198.325	2150.05	NaN	NaN
205.416	2250.83	NaN	NaN
212.551	2348.96	NaN	NaN
219.614	2450.59	NaN	NaN
226.581	2549.07	NaN	NaN
233.355	2649.71	NaN	NaN
239.902	2749.66	NaN	NaN
246.378	2850.68	NaN	NaN
252.844	2949.11	NaN	NaN
259.256	3051.11	NaN	NaN
265.668	3149.08	NaN	NaN
271.988	3249.99	NaN	NaN
278.188	3350.22	NaN	NaN
284.434	3449.54	NaN	NaN
290.521	3549.95	NaN	NaN
296.447	3650.04	NaN	NaN
302.491	3749.79	NaN	NaN
308.584	3849.8	676.71	51.5963
314.513	3949.78	887.077	53.8054
320.134	4049.6	758.504	78.3079
325.753	4150.8	812.182	62.4799
331.404	4248.91	666.542	52.4359
336.889	4350.53	769.471	58.5649
342.432	4450.56	944.878	36.6638
347.963	4548.36	692.847	45.3613
353.32	4649.94	868.566	57.4064
358.574	4750.08	665.706	52.3298
363.889	4851.01	587.789	57.5952
369.383	4949.64	498.636	40.1791
374.712	5050.03	627.405	51.7329
379.764	5149.75	748.596	59.8326
384.637	5250.03	656.249	67.9341
389.619	5350.01	714.619	67.6756
394.865	5449.9	774.051	75.1139
399.884	5549.54	848.968	56.947
404.916	5650.73	838.959	72.1654
410.022	5748.74	824.599	61.1281
414.974	5850.37	878.541	75.9183
419.991	5950.52	774.121	86.7383
425.033	6048.65	788.427	81.9995
429.981	6150.64	1054.91	64.6259
434.964	6250.79	909.194	70.7069
440	6348.94	1092.56	76.622
444.958	6449.96	NaN	NaN
449.918	6551.12	586.598	119.338
454.986	6649.76	684.04	89.2582
459.96	6747.51	556.493	86.087
464.707	6850.65	634.372	55.9493
469.382	6949.44	723.64	132.338
474.055	7050.52	482.528	105.293
478.751	7150.25	487.547	241.822
483.488	7249.95	504.466	307.08
488.237	7350.17	266.239	403.011
492.949	7449.59	NaN	NaN
497.574	7549.77	NaN	NaN
502.06	7649.39	NaN	NaN
506.447	7750.03	NaN	NaN
510.803	7849.78	468.688	333.264
515.157	7950.11	410.541	360.243
519.384	8049.36	486.015	240.521
523.541	8150.24	515.472	211.089
527.771	8249.85	322.48	492.454
531.957	8349.84	576.785	161.883
536.086	8449.9	NaN	NaN
540.213	8549.83	NaN	NaN
544.319	8649.81	NaN	NaN
548.364	8749.93	NaN	NaN
552.429	8850.1	NaN	NaN
556.535	8949.89	NaN	NaN
560.597	9049.91	NaN	NaN
564.686	9150.22	NaN	NaN
568.892	9250.11	NaN	NaN
573.168	9349.85	NaN	NaN
577.376	9450.18	633.719	128.591
581.538	9550.06	664.167	116.667
585.76	9650.14	447.588	228.749
589.99	9749.39	436.021	232.861
594.193	9850.93	721.806	208.155
598.453	9949.97	669.354	203.916
602.761	10049.3	471.881	261.525
607.025	10150.3	575.357	186.611
611.327	10250.3	497.716	233.477
615.694	10350	395.608	248.939
620.056	10449.7	424.546	228.695
624.415	10550.8	NaN	NaN
628.831	10650.1	611.817	186.363
633.08	10749.1	625.583	156.825
637.246	10849.9	581.915	144.065
641.503	10949.7	NaN	NaN
645.776	11050.7	NaN	NaN
650.032	11149.5	676.206	131.458
654.252	11249.6	619.347	134.133
658.449	11351.3	731.849	121.72
662.698	11450.1	839.413	101.05
667	11549.7	812.804	120.004
671.233	11649.6	671.263	107.292
675.378	11749.5	1646.01	83.0953
679.436	11850.2	868.112	149.107
683.318	11949.1	530.535	87.7486
686.943	12050.6	770.357	85.5921
690.477	12148.7	863.244	77.254
693.956	12250.3	909.022	71.8738
697.298	12348.8	976.076	93.5568
700.433	12450.1	972.79	77.2633
703.472	12549.2	1003.71	78.6165
706.491	12649.6	1072.73	68.036
709.417	12749.8	1077.68	76.2359
712.265	12849.9	1259.36	87.7178
715.072	12949.5	1027.99	79.8593
717.841	13050.5	NaN	NaN
720.601	13150.3	1118.38	72.047
723.384	13249.7	1318.72	69.9511
726.142	13349.9	1253.76	95.853
728.847	13449.7	1149.87	128.872
731.519	13550.6	1335.52	166.31
734.206	13649.6	1048.94	163.733
736.877	13749.7	1393.98	154.93
739.54	13850.3	1442.99	139.009
742.193	13949.6	1291.4	86.7614
744.802	14050.6	1195.69	102.259
747.415	14150.3	1154.08	108.903
750.017	14249	1191.88	96.4823
752.579	14350.2	1034.12	95.7782
755.196	14450.1	987.618	136.765
757.909	14549.7	957.891	171.135
760.586	14650.1	1009.73	125.333
763.236	14749.9	1094.89	138.415
765.899	14849.7	992.979	162.457
768.472	14949	960.651	179.567
770.895	15048.7	1133.52	179.501
773.197	15150.1	1194.94	242.243
775.466	15249.7	1211.77	217.517
777.706	15349.6	1498.28	205.274
779.949	15451.4	1531.42	247.16
782.214	15548.9	1696.33	172.677
784.409	15649	1305.13	151.586
786.49	15750	1470.88	177.351
788.522	15850.2	1170.34	157.966
790.561	15949.8	NaN	NaN
792.588	16049.8	1454.86	204.805
794.609	16150.4	1296.71	200.52
796.635	16249.5	1242.98	231.242
798.63	16349.6	1371.88	236.664
800.569	16449.7	1956.08	257.474
802.458	16549.8	1500.62	236.861
804.302	16649.6	1403.78	272.618
806.13	16750.4	1500.24	266.836
807.999	16850.7	1461.43	310.022
809.884	16949.1	1541.5	314.466
811.676	17049.6	1405.67	266.352
813.38	17149.9	1573.05	348.933
815.071	17249.9	1619.02	362.807
816.739	17350	2119.03	386.25
818.385	17449.6	2143.57	371.642
819.99	17550.5	2450.29	465.767
821.578	17649.4	3605.42	509.032
823.149	17749.9	2285.58	634.455
824.677	17849.9	1174.84	525.227
826.192	17949.8	1141.17	509.631
827.667	18049.4	2099.88	429.414
829.088	18150.1	1614.88	483.57
830.497	18250.2	1718.95	522.534
831.922	18349.7	2123.81	528.112
833.329	18449.6	2126.35	475.13
834.712	18551.1	1927.61	478.791
836.116	18649.3	1176.82	474.738
837.495	18749.5	1171.28	594.884
838.822	18850.5	1104.03	669.375
840.154	18949.9	1250.8	504.71
841.495	19050	1256.29	479.979
842.832	19150	1247.15	502.313
844.164	19249.9	1206.77	519.794
845.479	19349.8	1183.34	551.746
846.772	19450	1042.98	526.015
848.05	19549.7	1220.75	531.504
849.297	19649.5	1349.01	617.884
850.501	19749.9	1270.46	449.601
851.681	19850	1065.58	747.106
852.856	19950.1	1015.65	531.604
854.032	20049.6	1226.74	591.374
855.199	20149.8	1209.22	636.311
856.354	20250	1220.62	596.58
857.503	20349.9	1165.75	631.23
858.635	20449.6	1227.46	616.453
859.73	20549.5	NaN	NaN
860.786	20650.2	1117.5	639.718
861.829	20749.9	1049.86	646.208
862.869	20849.8	1010.03	579.022
863.899	20949.8	1128.01	571.556
864.923	21050.1	1207.25	570.435
865.941	21149.5	1132.5	597.121
866.942	21249.3	1250.63	656.924
867.919	21349.7	1092.35	602.499
868.882	21450	1109.54	706.734
869.839	21549.8	1096.2	625.53
870.792	21650.2	NaN	NaN
871.749	21750.1	NaN	NaN
872.713	21849.9	1411.17	574.462
873.678	21950.1	1270.2	523.663
874.646	22050.1	1358.27	550.502
875.628	22150.1	1487.76	683.531
876.622	22250	1321.57	762.287
877.619	22349.9	1199.12	549.795
878.606	22450	1381.48	613.746
879.581	22550	1586.4	550.474
880.544	22650	1351.44	409.854
881.504	22750	1493.6	516.629
882.468	22850	1358.56	401.874
883.427	22950	1313.05	475.39
884.37	23050	1193.66	523.931
885.306	23150	NaN	NaN
886.239	23249.9	1095.33	465.196
887.171	23350.1	1207.09	427.349
888.106	23450.1	1338.76	506.359
889.047	23550.2	1113.37	453.007
889.988	23649.6	1072.36	341.067
890.918	23749.5	1073.04	325.692
891.835	23850	1100.47	387.258
892.741	23949.8	1127.84	504.993
893.636	24049.9	1339.78	552.145
894.513	24150	1214.68	502.352
895.395	24250.1	979.349	505.31
896.305	24350.4	1156.74	438.893
897.23	24449.9	1058.17	549.036
898.148	24549.7	1080.77	595.468
899.055	24649.9	1084.67	540.827
899.957	24750	1065.71	510.328
900.859	24850.3	1300.4	551.01
901.773	24950.3	1031.2	822.81
902.707	25050.2	911.169	709.72
903.659	25149.9	917.292	709.597
904.615	25249.9	940.069	910.817
905.558	25350	988.533	744.126
906.495	25450	1115.62	812.292
907.426	25550	917.222	704.292
908.343	25649.9	860.464	882.669
909.246	25749.9	1132.95	334.152
910.141	25849.9	676.857	398.213
911.042	25950.6	839.025	385.457
911.955	26050	1153.57	462.691
912.874	26149.9	1301.94	460.412
913.788	26249.7	1723.08	656.723
914.691	26350	992.021	619.65
915.584	26450	1153.39	626.803
916.476	26550	1189.37	551.657
917.384	26650.2	1099.77	547.755
918.305	26750	994.955	547.529
919.219	26849.8	1049.43	573.474
920.122	26949.9	1168.7	567.194
921.024	27050.1	1743.5	587.458
921.927	27149.8	1766.08	482.524
922.823	27249.8	1432.06	501.404
923.712	27350	1110.19	510.658
924.598	27450.1	1223.5	633.64
925.501	27550	1410.1	452.788
926.438	27650.1	1283.07	409.839
927.41	27750.2	1184.7	393.861
928.389	27849.8	1567.16	415.296
929.349	27949.9	1371.16	554.369
930.319	28050.4	1102.96	530.331
931.313	28150.1	1197.55	484.709
932.32	28250	1220.81	498.414
933.314	28349.7	1112.34	429.613
934.282	28449.7	1242.55	508.859
935.236	28550.1	1140.1	422.787
936.199	28650.4	1171.78	451.136
937.193	28750.8	1079.35	399.767
938.227	28850.4	1031.87	367.695
939.295	28950.4	1463.92	280.789
940.39	29050.1	1382.17	459.429
941.495	29150	1637.59	282.772
942.602	29249.9	1673.01	321.164
943.703	29350	1275.91	314.281
944.798	29450	1552.48	371.544
945.901	29551.2	NaN	NaN
947.053	29651.3	NaN	NaN
948.236	29749.2	2369.25	423.55
949.389	29849.8	1376.49	448.434
950.508	29950	1994.13	451.786
951.619	30050	1106.47	471.436
952.731	30149.4	1156.74	527.415
953.811	30249.4	1253.97	602.816
954.851	30350	1313.99	699
955.88	30450.4	1383.74	624.02
956.914	30549.8	1382.88	629.473
957.952	30650.3	1533.79	585.716
959.003	30750.7	1659.28	485.646
960.066	30849.5	1939.4	440.167
961.121	30949.9	1899.96	435.116
962.168	31050	1669.97	526.446
963.201	31149.5	1853.51	459.353
964.212	31249.9	1813.75	419.928
965.229	31350.6	1511.53	445.492
966.269	31450.1	1305.13	440.637
967.302	31549.6	1840.31	469.485
968.306	31649.8	1835.67	516.362
969.294	31750	2353.56	517.805
970.282	31850	1543.14	447.938
971.273	31950.1	1580.09	395.702
972.28	32050.3	1751.79	372.845
973.317	32150.2	1611.18	258.889
974.388	32250.3	1566.21	231.636
975.504	32350.1	1667.28	226.155
976.636	32449.8	1961.4	208.037
977.75	32550	1553.69	210.379
978.856	32650	1798.83	269.607
979.959	32749.8	1606.16	222.345
981.053	32849.6	1547.47	271.608
982.135	32949.8	1527.99	265.092
983.205	33049.7	1706.54	313.899
984.245	33149.4	1570.64	282.808
985.242	33249.4	1440.71	269.971
986.231	33350.7	2017.54	301.696
987.265	33450.7	1363.52	194.905
988.348	33550.3	1539.95	238.79
989.471	33650.1	1298.81	198.068
990.601	33749.9	1574.4	183.726
991.716	33850.1	1488.07	303.521
992.829	33949.6	1094.87	252.505
993.931	34049.8	1396.44	293.63
995.023	34150.4	1215.52	232.118
996.119	34249.8	1355.3	235.18
997.209	34349.8	1417.34	208.387
998.292	34450.1	1435.56	260.109
999.378	34550	1385.83	234.891
1000.46	34649.9	1491.57	255.422
1001.54	34750.1	1409.09	218.849
1002.64	34850.1	1312.42	312.593
1003.76	34950.2	1391.09	267.564
1004.9	35050.3	1504.54	161.853
1006.07	35150.4	1517.67	159.984
1007.25	35250.3	1997.78	162.427
1008.46	35350	1960.35	121.801
1009.68	35450.1	1526.28	193.365
1010.9	35549.9	1313.66	199.218
1012.13	35649.7	1448.36	201.992
1013.35	35750.1	1344.8	209.133
1014.57	35849.8	1375.58	219.803
1015.78	35949.9	1241.76	191.195
1016.97	36050.2	1369.02	263.81
1018.16	36149.7	1184.09	191.303
1019.34	36250	1227.68	215.078
1020.51	36350	1329.84	227.684
1021.68	36450.1	1440.82	246
1022.85	36550.1	1522.5	247.432
1024.04	36650.6	1731.08	255.973
1025.25	36750.5	1422.15	247.761
1026.51	36850.2	1535.33	213.576
1027.8	36950.2	1544.89	242.164
1029.1	37049.9	1442.3	208.464
1030.4	37149.9	1755.14	222.208
1031.7	37250.2	1513.18	166.146
1033	37349.8	1654.23	170.99
1034.3	37449.7	1348.65	145.401
1035.59	37550.3	1189.03	139.713
1036.93	37650.8	1957.82	134.879
1038.31	37750.4	2142.96	90.8453
1039.75	37850.2	1653.66	135.362
1041.21	37950.1	1637.98	108.941
1042.68	38050.3	1633.6	125.388
1044.19	38150.8	1661.17	116.301
1045.77	38250.3	1431.01	110.94
1047.39	38349.7	1661.23	128.172
1048.97	38449.5	1535.43	109.275
1050.52	38550.3	1624.38	91.9224
1052.09	38649.6	1403.64	121.86
1053.66	38750.5	1677.65	135.106
1055.26	38849.8	1788.89	134.56
1056.84	38949.5	1745.42	111.674
1058.38	39050.2	NaN	NaN
1059.93	39149.7	1543.35	143.625
1061.46	39249.7	NaN	NaN
1062.95	39349.6	NaN	NaN
1064.39	39449.7	2003.08	162.746
1065.8	39549.9	2000.02	186.023
1067.19	39650	2116.53	228.309
1068.54	39749.6	1880.92	315.159
1069.84	39850.1	2096.1	316.823
1071.15	39951.1	2031.8	282.673
1072.53	40050.3	1821.83	322.148
1073.96	40149.8	2101.25	322.892
1075.38	40249.9	2001.87	336.342
1076.8	40350.1	2082.33	341.639
1078.21	40449.9	2180.05	297.243
1079.6	40549.9	2546.84	327.876
1080.94	40649.3	2856.12	263.785
1082.24	40749.7	3195.22	234.647
1083.54	40849.9	2297.29	203.461
1084.82	40949.8	2291.86	214.224
1086.08	41049.7	1931.59	183.96
1087.33	41150.3	2018.07	171.762
1088.62	41250.2	1742.99	159.954
1089.94	41349.7	1987.54	266.73
1091.24	41449.6	1961.96	208.264
1092.51	41549.9	1785.79	198.57
1093.76	41650.1	2059.39	188.8
1095	41749.9	1869.3	206.389
1096.24	41849.7	1961.36	229.717
1097.42	41949.6	1860.62	455.531
1098.54	42049.9	NaN	NaN
1099.64	42150	NaN	NaN
1100.74	42250.1	2147.81	273.108
1101.84	42350.6	1909.59	210.737
1102.97	42450.2	1867.14	167.361
1104.09	42548.9	1657.63	173.478
1105.19	42649.9	1928.25	172.436
1106.27	42750	1753.13	192.876
1107.35	42850.1	1904.41	235.84
1108.46	42950.1	1770.16	124.36
1109.58	43049.9	1912.38	109.607
1110.68	43150.4	1962.01	133.179
1111.79	43250.4	1674.75	131.469
1112.93	43349.7	1806.5	290.904
1114.08	43450.2	1872.06	249.177
1115.21	43549.7	1787.27	196.289
1116.33	43649.9	1746.2	171.65
1117.45	43750	1880.41	111.713
1118.59	43850	1760	215.513
1119.74	43950	1529.49	332.289
1120.89	44049.7	1974.81	270.172
1122.03	44150.3	1874.46	199.613
1123.18	44250.2	2061.35	157.298
1124.32	44349.7	1881.74	204.545
1125.46	44450.2	1955.47	210.009
1126.62	44550.1	1879.15	181.219
1127.79	44649.9	1930.8	125.734
1128.97	44750.2	2018.65	153.739
1130.16	44850.3	1884.65	125.898
1131.36	44950	NaN	NaN
1132.62	45050.1	1962.28	79.643
1133.93	45149.7	1903.13	79.9823
1135.22	45250	1942.97	85.8603
1136.53	45350.1	1859.13	91.5485
1137.85	45450.2	2070.11	125.102
1139.19	45551	1338.64	152.052
1140.59	45650	1804.01	113.1
1141.99	45749.9	1791.19	157.584
1143.39	45849.7	1789.76	97.7257
1144.77	45950.1	1837.45	77.3646
1146.16	46050	1696.47	67.3533
1147.57	46150.2	1597.93	72.9501
1148.99	46250.2	1645.59	79.3878
1150.44	46350.1	1579.15	100.215
1151.9	46450	1559.55	58.8037
1153.35	46549.7	1642.1	68.6339
1154.78	46649.8	1581.79	65.9182
1156.17	46749.4	1475.01	59.268
1157.53	46849.9	NaN	NaN
1158.85	46949.6	1706.99	152.862
1160.15	47049.5	1521.62	65.4519
1161.4	47149.6	1491.93	119.501
1162.59	47249.8	NaN	NaN
1163.75	47349.8	1600.59	232.664
1164.88	47449.6	1502	294.432
1165.98	47549.1	1533.01	143.786
1167.06	47649.8	1334.2	259.002
1168.12	47750.7	1464.41	55.7487
1169.2	47849.5	1388.11	129.601
1170.25	47949.5	1400.84	117.654
1171.26	48049.7	1351.16	145.695
1172.25	48149.6	1506.42	194.166
1173.19	48249	1354.44	314.508
1174.09	48349.6	1560.38	333.616
1174.96	48449.8	1599.7	219.558
1175.83	48549.7	1478.9	208.231
1176.68	48649.8	1643.27	174.549
1177.51	48750	NaN	NaN
1178.34	48849.9	1624.26	220.894
1179.15	48950	1513.27	274.534
1179.96	49049.9	1464.31	245.586
1180.78	49150.4	1728.86	229.658
1181.6	49250	1440.38	264.616
1182.44	49350	1527.85	248.727
1183.26	49449.8	1453.15	400.248
1184.08	49550.1	1271.57	339.374
1184.9	49650.1	1464.92	254.924
1185.72	49750.1	1437.55	285.672
1186.55	49850	NaN	NaN
1187.38	49950	1412.71	218.666
1188.21	50049.9	1250.48	295.349
1189.03	50149.4	1624.54	191.987
1189.82	50249.3	1906.93	258.56
1190.6	50350	1562.81	234.222
1191.36	50450	1578.6	221.578
1192.13	50550.2	1745.91	181.484
1192.92	50650.6	1410.92	173.445
1193.71	50749.9	NaN	NaN
1194.51	50850	2109.04	141.435
1195.3	50949.9	2126.81	94.6057
1196.08	51050	2755.04	100.569
1196.87	51150.3	2335.52	100.431
1197.66	51250	1544.83	136.081
1198.44	51350	1820.81	146.333
1199.23	51449.9	1585.4	155.201
1200.02	51550.7	1564.06	145.968
1200.81	51649.8	1382.85	167.686
1201.61	51749.9	1641.51	157.072
1202.39	51850	1669.1	132.05
1203.16	51950.1	1415.7	182.878
1203.94	52050.3	1627.99	134.479
1204.72	52150.2	1456.34	121.93
1205.52	52250	1584.6	156.238
1206.33	52350	1425.54	119.294
1207.14	52449.9	1767.41	223.97
1207.94	52550	1576.5	200.262
1208.74	52650	1501.08	184.66
1209.54	52750	1214.82	141.098
1210.33	52850	1772.89	147.611
1211.12	52949.8	1512.54	149.78
1211.89	53049.6	1467.34	128.849
1212.66	53150	1651.26	111.569
1213.42	53250	1726.89	198.379
1214.18	53350.1	1902.45	106.184
1214.95	53449.6	1651.96	85.0604
1215.7	53550	1822.37	81.3828
1216.45	53650	1754.03	85.207
1217.21	53750	1548.87	98.068
1217.97	53851.1	1852.48	48.957
1218.75	53949.9	1590	63.8478
1219.54	54050	1789.71	62.2922
1220.33	54150	2096.38	35.9119
1221.11	54249.9	1805.48	41.2105
1221.88	54349.6	1815.95	70.9454
1222.65	54449.9	1786.21	111.322
1223.41	54550	1848.83	103.462
1224.17	54649.8	1544.6	110.716
1224.91	54749.5	1814.04	151.217
1225.65	54850	NaN	NaN
1226.37	54950	1839.51	130.648
1227.09	55049.9	1810.8	125.65
1227.81	55150.2	1632.21	166.084
1228.53	55250	NaN	NaN
1229.25	55349.8	1656.62	156.365
1229.96	55449	2015.72	167.77
1230.65	55550	1988.1	201.189
1231.32	55650	1907.74	179.518
1231.98	55750.7	1761.73	150.456
1232.66	55850	1661.66	161.574
1233.35	55950	1743.48	190.151
1234.06	56049.5	1606.89	165.985
1234.75	56149.7	2008.84	183.313
1235.43	56250	2231.1	163.965
1236.09	56349.2	1991.72	182.709
1236.73	56449.9	1882.68	214.701
1237.35	56550	1724.06	271.353
1237.96	56649.2	1778.42	234.314
1238.56	56750	1976.5	198.404
1239.15	56850	1946.08	264.904
1239.75	56950.1	2014.58	235.147
1240.36	57049.9	1794.78	239.599
1240.98	57151.1	2028.34	197.043
1241.62	57250	2300.2	265.833
1242.28	57350	2623.43	315.358
1242.93	57449.8	2563.27	165.588
1243.59	57550	2198.83	177.996
1244.24	57650	2456.55	142.766
1244.89	57750.3	2637.2	213.412
1245.55	57850	1725.81	63.0326
1246.22	57950.2	2013.17	159.413
1246.9	58049.8	1777.48	148.187
1247.57	58150	1574.36	118.881
1248.24	58250	1466.59	114.526
1248.91	58350.3	1965.14	121.713
1249.59	58450	1828.06	70.3299
1250.26	58549.9	1912.06	119.992
1250.93	58649.2	2177.76	136.908
1251.59	58750.1	2903	85.5266
1252.24	58850.1	2918.3	120.055
1252.9	58950.7	2380.09	98.8858
1253.57	59050	2245.63	120.048
1254.26	59150.2	2226.86	96.297
1254.96	59249.4	2115.03	60.5784
1255.65	59350	2198.8	96.0135
1256.33	59450	2357.32	143.472
1256.99	59549.9	NaN	NaN
1257.66	59650	NaN	NaN
1258.32	59750	1639.67	123.8
1258.96	59849.2	1936.37	100.263
1259.59	59950	2011.46	82.0859
1260.21	60049.7	2146	67.2824
1260.82	60149.8	2035.94	83.065
1261.42	60250	NaN	NaN
1262.02	60349.7	1799.76	140.036
1262.62	60450	1737.77	135.211
1263.2	60549.7	1646.8	179.221
1263.78	60649.9	1671.04	180.236
1264.35	60749.9	1741.32	151.983
1264.91	60849.5	1674.85	182.693
1265.46	60950	1185.22	239.884
1266.01	61049.1	1526.04	255.771
1266.54	61150	1663.17	255.25
1267.07	61249.4	1457.71	256.87
1267.58	61350	1537.41	227.747
1268.09	61449.7	1631.24	291.055
1268.6	61550	1828.34	244.276
1269.1	61649.9	2688.51	191.953
1269.6	61750	2362.98	210.486
1270.1	61850	1884.83	229.333
1270.61	61950	1918.02	238.534
1271.11	62049.8	2341.2	209.505
1271.6	62150	2224.94	379.702
1272.09	62249.6	NaN	NaN
1272.58	62350	NaN	NaN
1273.06	62449.6	NaN	265.482
1273.53	62550.1	NaN	203.594
1273.99	62648	NaN	239.964
1274.44	62750	NaN	NaN
1274.87	62849.7	NaN	NaN
1275.3	62949.9	NaN	NaN
1275.72	63050	NaN	NaN
1276.14	63149.9	NaN	NaN
1276.56	63250	NaN	NaN
1276.97	63348.9	NaN	NaN
1277.38	63449.9	NaN	NaN
1277.77	63549.9	NaN	NaN
1278.16	63649.8	NaN	NaN
1278.55	63750	NaN	NaN
1278.93	63849.5	NaN	598.952
1279.31	63950	NaN	522.842
1279.68	64050	2252.53	507.833
1280.05	64149.4	1736.12	457.851
1280.42	64250	1327.07	436.986
1280.78	64350.1	1521.41	447.269
1281.15	64450.4	1561.59	434.062
1281.54	64549.9	1539.98	475.702
1281.93	64650	1408.4	369.431
1282.32	64750	1389.6	298.362
1282.71	64850	1405.74	275
1283.1	64949.8	1519.95	284.412
1283.48	65050.1	1454.34	390.539
1283.86	65149.4	1358.75	318.595
1284.22	65250	1492.68	288.961
1284.57	65350.1	1512.17	336.545
1284.91	65449.7	1739.72	336.873
1285.25	65550	1563.88	338.42
1285.59	65650	1342.64	343.277
1285.93	65749.9	1439.08	321.073
1286.26	65849.9	1450.55	319.502
1286.6	65950	1458.61	379.347
1286.93	66049.7	1280.23	313.404
1287.27	66150	1276.74	357.718
1287.6	66250	1131.42	340.777
1287.92	66349.4	1132.88	417.945
1288.24	66450.1	1316.47	409.936
1288.56	66550	1196.45	437.414
1288.87	66649.6	1227.14	429.13
1289.18	66750	1392.49	463.895
1289.47	66850	1370.23	519.396
1289.77	66950	1343.79	494.689
1290.06	67049.8	1281.67	356.675
1290.35	67149.9	1338.95	401.843
1290.64	67250	1483.87	420.096
1290.93	67349.6	1149.63	441.748
1291.22	67450	1399.6	428.95
1291.5	67550	1105.85	421.202
1291.78	67650	1255.02	447.651
1292.06	67749.4	1270.73	367.592
1292.33	67850	1318.64	361.237
1292.61	67949.9	1298.15	402.89
1292.88	68049.9	1088.84	419.573
1293.14	68150.1	1126.17	466.327
1293.41	68250.1	1185.24	497.948
1293.67	68350.1	949.716	480.529
1293.93	68449.5	997.082	605.721
1294.18	68549.9	1345.4	476.626
1294.43	68650	1194.06	483.59
1294.68	68750.1	1120.31	476.948
1294.93	68849.5	1287.89	449.07
1295.18	68950	1323.31	414.572
1295.42	69050.1	1261.65	461.36
1295.66	69150	1251.43	445.412
1295.9	69250.1	1190.95	429.64
1296.15	69350.1	1400.14	389.704
1296.39	69450.1	1296.7	420.976
1296.64	69550	1229.12	353.049
1296.88	69649.9	1031.67	268.873
1297.13	69750	1143.05	197.045
1297.37	69850.1	1176.66	275.5
1297.61	69950	1154.31	293.809
1297.85	70049.9	1232.81	329.841
1298.09	70149.8	1167.92	285.397
1298.32	70250.1	1242.58	381.549
1298.55	70349.9	1209.88	491.116
1298.78	70449.9	1195.15	329.489
1299.02	70550	1091.5	354.367
1299.25	70650.1	1170.24	299.651
1299.48	70749.9	1176.06	284.33
1299.71	70849.9	1126.01	238.146
1299.94	70950.4	1245.12	180.507
1300.18	71050.2	1150.33	149.421
1300.41	71150.2	1257.8	139.585
1300.65	71250.2	1201.25	152.997
1300.89	71350.1	1287.53	132.112
1301.13	71450	1345.67	95.8396
1301.39	71550	1279.4	104.395
1301.64	71649.9	1245.77	133.367
1301.89	71750	1327.09	111.371
1302.15	71849.9	1256.82	125.544
1302.41	71950	1179.69	67.8697
1302.67	72050.1	1135.33	54.9085
1302.93	72150	1170.02	54.7219
1303.18	72250.1	1049.74	64.5899
1303.44	72350.1	1206.26	70.1047
1303.7	72450.1	1080.99	80.6402
1303.95	72549.3	1144.52	75.0662
1304.2	72650	1139.09	53.9863
1304.45	72750.1	1126.9	62.2518
1304.69	72850	1011.13	116.331
1304.94	72949.9	990.34	90.6099
1305.18	73050.1	1050.96	106.111
1305.42	73150	1106.12	91.8849
1305.67	73249.9	1014.49	102.047
1305.91	73349.6	999.85	101.35
1306.15	73450	1009.08	105.651
1306.38	73550	1030.78	139.449
1306.61	73650	1075.72	198.327
1306.85	73750	1239.81	178.273
1307.07	73849.3	1392.28	229.708
1307.29	73949.9	1347.6	215.448
1307.51	74050.1	1204.62	165.178
1307.73	74150	1169.32	168.549
1307.95	74250.6	1287.22	204.707
1308.17	74349.9	1352.48	147.828
1308.4	74449.9	1230.84	154.228
1308.63	74550	1199.71	115.972
1308.86	74650	1233.36	125.761
1309.1	74750.2	1101.48	121.441
1309.33	74849.9	1188.09	107.866
1309.57	74950	1186.53	92.3697
1309.81	75050	1154.48	107.378
1310.07	75151.5	1253.55	103.969
1310.33	75249.9	1271.7	136.672
1310.6	75349.9	1329.52	130.82
1310.87	75450	1411.99	109.257
1311.14	75550	1229.49	72.2461
1311.42	75650	1130.88	78.3857
1311.7	75750	1058.64	117.672
1311.98	75850	1025.04	64.4421
1312.26	75950.1	1078.64	57.7533
1312.54	76050.1	1193.96	88.5518
1312.82	76150.1	1237.28	63.49
1313.09	76249.9	1212.93	94.179
1313.37	76350.1	1265.56	90.6626
1313.64	76450	1180.64	108.119
1313.9	76549.1	1023.93	94.2019
1314.16	76650	1138.25	122.572
1314.41	76749.9	1162.22	122.516
1314.65	76849.9	1226.23	148.601
1314.9	76949.9	1334.48	201.704
1315.14	77050	1373.79	285.724
1315.38	77150.1	1211.1	254.255
1315.62	77250	1026.37	243.955
1315.86	77349.9	1241.01	154.535
1316.09	77449.8	1200.57	181.047
1316.33	77549.8	1134.61	185.858
1316.56	77649.9	1242.13	213.537
1316.8	77749.9	1263.48	221.427
1317.04	77850.6	1229.39	152.98
1317.28	77950.1	1139.84	165.918
1317.52	78050	1234.19	132.545
1317.76	78149.9	1383.34	137.651
1318	78249.4	1325.19	163.774
1318.24	78349.9	1186.08	180.78
1318.48	78449.9	1086.81	146.449
1318.71	78550	1006.32	166.004
1318.95	78649.6	1188.05	151.345
1319.18	78750.2	1192.89	144.201
1319.42	78850	1248.17	115.595
1319.65	78949.9	999.177	142.93
1319.88	79050	1082.02	150.598
1320.11	79150.1	1236.78	105.322
1320.34	79250.1	1139.05	114.851
1320.56	79350	1220.4	97.2649
1320.79	79449.8	1072.85	129.761
1321.02	79550	1050.81	86.3079
1321.25	79649.8	1184.43	110.085
1321.48	79749.9	999.362	113.297
1321.71	79849.9	988.411	108.154
1321.95	79949.9	992.552	112.028
1322.18	80050.1	1123.16	108.738
1322.4	80149.9	1055.8	80.6235
1322.63	80250	1018.82	101.228
1322.86	80350.1	1012.79	85.6728
1323.09	80450	966.108	77.2445
1323.33	80550	976.124	90.2304
1323.56	80650.1	1032.44	65.008
1323.79	80749.9	962.047	64.5369
1324.02	80850.1	990.201	114.594
1324.25	80950	1079.26	82.0476
1324.48	81050	1160.35	110.537
1324.72	81150	946.153	115.948
1324.95	81250.3	1046.37	97.3
1325.19	81349.8	1019.21	103.169
1325.43	81449.9	930.995	55.8965
1325.67	81549.9	1105.7	55.5998
1325.91	81649.9	930.392	50.9919
1326.15	81749.9	948.959	89.6364
1326.39	81849.9	1042.16	72.9136
1326.63	81950.1	1053.44	61.4866
1326.87	82050.1	913.032	63.8716
1327.11	82150	922.687	48.1362
1327.35	82250.1	944.203	68.0415
1327.58	82350.1	984.158	87.6733
1327.82	82450	878.076	56.939
1328.06	82549.7	847.71	76.4057
1328.29	82650	847.037	52.6955
1328.53	82749.9	846.204	75.3836
1328.76	82849.9	814.445	90.8306
1328.99	82949.5	783.591	67.5185
1329.23	83049.9	764.353	74.1678
1329.46	83149.9	879.886	75.2715
1329.69	83249.9	829.748	65.2421
1329.92	83350.1	937.677	87.7423
1330.15	83449.9	824.501	54.6196
1330.39	83549.8	825.304	48.8173
1330.62	83650	747.453	55.107
1330.86	83750.2	658.789	59.0729
1331.1	83850	733.228	49.9161
1331.33	83949.9	813.519	56.2082
1331.57	84050.1	821.202	58.3381
1331.8	84150.1	1015.66	66.8388
1332.03	84249.7	915.282	67.4465
1332.27	84350	828.765	60.8456
1332.5	84449.9	872.826	69.6983
1332.73	84549.9	906.841	85.4555
1332.95	84648.9	972.256	80.3414
1333.17	84750	835.624	65.2851
1333.39	84850.1	994.184	57.215
1333.61	84950	994.223	53.9515
1333.82	85049.9	1004.76	59.7898
1334.04	85149.6	909.747	63.9902
1334.25	85249.9	999.565	53.8051
1334.46	85350.1	996.151	73.4641
1334.68	85450.2	986.542	48.3764
1334.89	85550	1035.41	82.2936
1335.1	85650	1027.37	91.8689
1335.31	85750	917.404	106.674
1335.52	85850.1	952.458	102.462
1335.73	85950.1	995.779	82.5217
1335.93	86049.7	1026.95	89.7095
1336.14	86150	1040.14	63.4962
1336.34	86249.8	1068.26	87.9909
1336.54	86349.9	1148.63	93.7993
1336.74	86450	1087.76	94.1882
1336.94	86549.6	982.063	94.973
1337.13	86649.9	1090.15	100.682
1337.33	86749.8	1033.14	90.3551
1337.52	86850	1077.01	110.769
1337.71	86950.1	1084.46	95.9742
1337.9	87050	1092.84	107.851
1338.09	87149.9	1132.24	158.918
1338.27	87250.1	1158.22	127.037
1338.44	87350	1131.07	126.971
1338.62	87449.9	998.912	119.626
1338.8	87550.1	1091.87	182.315
1338.97	87648.6	1068.46	163.861
1339.14	87749.9	1041.9	145.329
1339.31	87850	1160.7	202.362
1339.47	87950.2	1171.16	247.865
1339.63	88050	1162.4	296.46
1339.8	88149.8	1158.54	242.689
1339.96	88249.4	1005.35	237.173
1340.12	88349.9	1140.46	217.295
1340.28	88449.9	1128.36	583.84
1340.43	88550	957.348	377.141
1340.59	88650	1281.16	402.575
1340.75	88750	1037.69	574.915
1340.9	88850	1257.63	292.574
1341.06	88950	1087.79	198.975
1341.22	89049.8	1203.52	111.198
1341.38	89150	1206.08	127.979
1341.54	89250.2	1520.12	61.9711
1341.7	89350.1	1070.73	188.26
1341.86	89449.9	1060.25	137.003
1342.02	89550.9	1070.41	204.428
1342.18	89649.7	1200.66	96.6479
1342.35	89749.8	1222.26	67.619
1342.52	89849.8	1261.49	47.1779
1342.68	89949.8	1314.44	46.7959
1342.85	90049.9	1449.37	33.6607
1343.02	90151	1639.42	118.45
1343.19	90250	1208.92	111.419
1343.37	90350.2	1347.82	113.2
1343.55	90450	1195.59	102.801
1343.72	90549.9	1263.27	112.829
1343.9	90650	1248.22	129.772
1344.08	90750.1	991.301	271.399
1344.26	90850	1265.09	91.0889
1344.45	90950	1612.69	59.0677
1344.63	91049.9	1459.25	88.0852
1344.81	91150.1	1214.57	48.5142
1344.99	91250.3	1202.33	92.8854
1345.18	91350.1	1176.08	88.4299
1345.36	91450.1	1227.21	82.5829
1345.55	91550.1	1209.71	79.0316
1345.73	91650.1	NaN	NaN
1345.92	91750.1	1365.23	60.2764
1346.1	91850	1430.89	119.151
1346.29	91950.1	1336.25	77.2922
1346.47	92050.1	1503.01	79.6118
1346.66	92150.1	1428.76	88.2155
1346.84	92250.1	1339.51	73.9499
1347.03	92350.1	1274.64	99.1272
1347.22	92450	1237.07	24.2593
1347.4	92550.1	1284.02	16.5978
1347.59	92650.2	1468.45	54.294
1347.78	92750.1	1275.98	79.412
1347.97	92850.2	1194.48	128.839
1348.16	92950.1	1387.45	220.649
1348.35	93050.1	1304.6	295.145
1348.54	93150	1411.96	135.806
1348.73	93250	1318.06	93.2008
1348.92	93350	1313.36	75.2826
1349.11	93450	1258.34	74.0131
1349.31	93550.1	1356.09	59.9159
1349.5	93650	1306.21	84.4046
1349.7	93749.9	1298	67.5899
1349.89	93850	1387.4	49.7181
1350.09	93950.2	1332.5	90.6445
1350.29	94050.1	1321.33	62.0326
1350.5	94150	1263.52	59.8681
1350.7	94249.9	1248.91	74.3737
1350.9	94350	1218.86	72.8248
1351.1	94450	1533.16	100.331
1351.31	94549.9	1422.58	112.399
1351.51	94649.8	1270.16	96.5701
1351.72	94750	1240.66	94.9104
1351.92	94850.2	1297.96	117.222
1352.13	94950.1	1158.35	74.2027
1352.33	95050.1	1262.43	103.188
1352.54	95150.2	1223.48	71.2094
1352.74	95250	1150.72	62.581
1352.95	95350.1	1265.97	68.8453
1353.16	95450	1228.22	73.0212
1353.37	95549.9	1249.22	67.1631
1353.58	95649.8	1214.16	97.7594
1353.79	95750	1135.37	135.401
1353.99	95850.2	1093.46	243.855
1354.2	95950.1	1130.61	141.599
1354.41	96050.1	1203.8	106.933
1354.62	96150	1186.6	72.5436
1354.83	96249.9	1136.07	71.8293
1355.04	96350	1188.41	107.83
1355.25	96450	1449.58	71.6853
1355.46	96550	1878.91	21.5495
1355.67	96650.1	1349.03	111.278
1355.88	96750.1	1243.23	43.0648
1356.1	96850.2	NaN	NaN
1356.31	96950.1	1136.38	151.197
1356.52	97049.9	1129.03	109.294
1356.74	97150	1230.89	98.6348
1356.95	97250.4	1234.62	97.3738
1357.17	97350	1205.34	79.951
1357.38	97450.1	1244.05	81.4316
1357.6	97550	1056.95	69.5664
1357.82	97649.8	1120.77	88.6607
1358.04	97749.8	NaN	NaN
1358.25	97850.2	NaN	NaN
1358.47	97950	1072.42	111.45
1358.68	98049.9	1055.07	76.2927
1358.9	98150	1159.73	85.4659
1359.11	98250.1	1117.09	105.677
1359.33	98350	1130.55	109.838
1359.54	98449.8	1118.13	125.228
1359.75	98550	1051.95	111.389
1359.96	98650.1	1079.52	120.386
1360.17	98750.2	1179.2	122.188
1360.38	98850.1	1151.43	118.422
1360.59	98950.1	1197.35	108.989
1360.8	99050.1	1106.44	116.673
1361.01	99149.6	1317.97	88.2713
1361.22	99250	1471.45	130.591
1361.42	99350.2	1339.39	77.8444
1361.63	99450.1	1396.05	68.4956
1361.84	99550	1600.16	85.8699
1362.04	99649.6	1404.39	96.1485
1362.25	99749.9	1558.1	88.0769
1362.45	99850	1499.5	146.524
1362.65	99950	1312.81	87.4514
1362.86	100050	1507.28	57.8652
1363.06	100150	1042.44	124.468
1363.26	100250	977.345	130.063
1363.46	100350	1121.52	154.809
1363.66	100450	1124.3	159.34
1363.87	100550	1108.46	172.035
1364.07	100650	NaN	NaN
1364.27	100750	1157.23	155.277
1364.48	100850	1181.89	136.899
1364.68	100950	1093.56	124.613
1364.89	101050	1049.66	103.597
1365.09	101150	990.676	55.3175
1365.3	101250	907.213	123.32
1365.51	101350	888.119	115.828
1365.72	101450	1104.68	129.469
1365.93	101550	965.661	130.184
1366.14	101650	1112.54	95.6206
1366.35	101750	1058.7	82.3366
1366.56	101850	1140.39	94.2475
1366.77	101950	848.599	87.3135
1366.98	102048	910.672	71.4131
1367.17	102150	914.484	77.9902
1367.36	102250	1023.8	96.5212
1367.55	102350	988.939	92.0052
1367.74	102450	937.598	114.6
1367.93	102550	984.704	123.403
1368.11	102650	975.31	84.9073
1368.29	102750	983.021	156.611
1368.47	102850	934.775	120.324
1368.65	102950	1074.32	145.356
1368.83	103050	983.082	141.352
1369	103149	1165.22	150.685
1369.18	103250	1238.56	192.283
1369.35	103350	1134.57	171.52
1369.51	103450	1203.59	174.045
1369.68	103550	1137.44	174.629
1369.85	103650	1091.26	183.863
1370.02	103749	956.705	142.547
1370.18	103850	942.092	118.072
1370.34	103950	1085.22	252.3
1370.5	104050	942.034	171.35
1370.66	104150	795.403	126.773
1370.82	104250	973.323	131.146
1370.98	104350	1096.12	124.834
1371.14	104450	NaN	NaN
1371.31	104550	NaN	NaN
1371.47	104650	NaN	NaN
1371.63	104750	NaN	NaN
1371.79	104850	1271.61	92.9958
1371.96	104950	1351	69.9616
1372.12	105050	1003.39	36.0837
1372.28	105150	1067.77	21.7195
1372.43	105250	946.95	24.0687
1372.59	105350	996.461	53.8943
1372.75	105450	1018	62.0574
1372.91	105550	1049	63.2194
1373.06	105650	982.455	119.819
1373.21	105750	924.968	103.541
1373.36	105850	1147.79	123.388
1373.51	105950	1043.54	105.527
1373.66	106050	967.034	111.459
1373.81	106150	927.842	110.582
1373.96	106250	1085.19	111.889
1374.11	106350	843.493	136.193
1374.27	106450	842.663	85.6344
1374.42	106550	1030.11	106.179
1374.58	106650	1115.49	93.8243
1374.74	106750	893.275	148.979
1374.89	106850	967.537	108.935
1375.04	106949	1397.61	156.085
1375.18	107050	1355.7	114.246
1375.32	107150	1574.16	69.9481
1375.45	107250	1307.31	71.8172
1375.59	107350	1363.87	51.7834
1375.73	107450	1544.05	85.8032
1375.87	107550	1388.35	124.325
1376	107646	1590.57	50.1347
1376.12	107750	1390.9	163.019
1376.23	107850	1304.88	121.411
1376.35	107950	1565.22	127.024
1376.46	108050	1679.68	116.303
1376.58	108150	1326.16	126.234
1376.7	108250	1440.04	114.967
1376.81	108350	1409.32	157.867
1376.93	108450	1482.49	88.5284
1377.04	108549	1320.98	141.049
1377.14	108650	1088.23	170.624
1377.24	108750	1199.9	155.692
1377.34	108850	1231.17	181.252
1377.44	108950	1199.26	163.009
1377.54	109050	1056.94	175.819
1377.64	109150	1009.35	166.163
1377.75	109250	947.645	248.492
1377.85	109350	1093.85	186.501
1377.95	109450	1124.17	174.408
1378.05	109550	939.85	173.357
1378.15	109650	1272.23	181.437
1378.25	109750	932.13	139.162
1378.35	109850	1080.11	180.401
1378.44	109950	1075.82	167.421
1378.54	110050	1042.25	192.307
1378.64	110150	1207	196.503
1378.74	110250	1026.37	196.089
1378.84	110350	1129.73	214.83
1378.94	110450	1046.88	202.497
1379.04	110550	975.511	192.458
1379.14	110650	1422.2	222.083
1379.24	110750	1160.54	237.719
1379.35	110850	1025.04	269.046
1379.45	110950	1034.77	290.375
1379.55	111050	1086.23	285.383
1379.65	111150	1116.47	451.937
1379.75	111250	1227.86	255.692
1379.86	111350	1012.57	387.096
1379.96	111450	958.442	565.027
1380.06	111550	1676.31	1381.14
1380.17	111650	1193.86	420.958
1380.28	111750	1085.49	273.294
1380.39	111850	1149.21	183.455
1380.5	111950	1253.69	165.257
1380.61	112050	1431.5	177.453
1380.72	112150	1182.36	167.169
1380.83	112250	1238.97	109.083
1380.94	112350	1236.9	134.233
1381.05	112450	1351	149.02
1381.17	112550	1366.93	96.4925
1381.28	112650	1475.07	166.276
1381.4	112750	1165.48	139.614
1381.52	112850	1232.97	100.897
1381.63	112950	1517.93	78.8924
1381.75	113050	1420.26	116.836
1381.87	113150	1252.34	125.196
1381.99	113251	1177.06	105.718
1382.11	113350	1331.9	73.9208
1382.23	113450	1663.93	87.1396
1382.36	113550	1785.69	86.4
1382.48	113650	1475.34	131.368
1382.61	113750	1101.09	113.637
1382.73	113850	1041.85	99.6129
1382.86	113950	1222.48	108.742
1382.98	114051	1254.67	81.416
1383.11	114150	1338.2	119.528
1383.24	114250	1204.18	90.9107
1383.37	114350	1246.01	93.5215
1383.5	114450	1299.16	89.7857
1383.63	114550	2109.71	96.4466
1383.76	114650	1304.09	210.59
1383.89	114750	1326.05	102.922
1384.02	114851	1338.68	113.339
1384.15	114950	1541.66	74.427
1384.29	115050	1379.45	56.4006
1384.43	115150	1211.24	63.4643
1384.56	115250	1197.77	60.7979
1384.7	115350	1249.44	75.5528
1384.83	115450	1312.3	83.0159
1384.97	115550	1328.84	82.4288
1385.11	115650	1081.85	101.297
1385.24	115750	1166.93	55.9443
1385.38	115850	950.458	61.1554
1385.52	115950	1269.29	51.7963
1385.66	116050	1273.67	81.7315
1385.8	116150	1203.88	65.7427
1385.94	116250	1429.31	86.5376
1386.09	116350	1403.92	81.5041
1386.25	116450	1265.61	41.5461
1386.41	116550	1682.64	134.811
1386.57	116650	1400.55	56.1609
1386.73	116750	1366.93	52.6135
1386.88	116850	1948.68	39.7671
1387.05	116950	1327.08	88.2439
1387.21	117050	1498.45	93.3669
1387.38	117150	1807.02	81.157
1387.55	117250	1505.04	128.144
1387.72	117350	1483.93	99.1282
1387.88	117450	1554.48	121.218
1388.05	117551	1322.8	138.18
1388.23	117650	1892.93	127.669
1388.41	117750	1442.38	287.167
1388.59	117850	2958.69	221.629
1388.76	117950	1422.54	244.344
1388.94	118050	1231.69	130.359
1389.12	118150	1070.32	79.1432
1389.29	118250	1099.2	69.0543
1389.47	118350	1326.21	52.3394
1389.64	118450	1135.94	75.5502
1389.82	118550	1271.77	58.7715
1389.99	118649	1120.71	97.0089
1390.16	118750	1086.95	99.7372
1390.33	118850	1052.19	105.742
1390.5	118950	1038.94	108.809
1390.67	119050	984.718	119.029
1390.84	119150	913.232	87.8113
1391.01	119250	1035.22	113.763
1391.18	119350	911.84	108.377
1391.34	119450	1337.1	115.426
1391.51	119550	982.666	210.127
1391.68	119650	1017.1	143.632
1391.85	119750	927.08	107.293
1392.01	119850	963.769	170.321
1392.18	119950	1073.44	112.323
1392.34	120050	855.367	732.104
1392.51	120150	670.566	269.646
1392.67	120250	852.114	170.853
1392.84	120350	915.887	126.976
1393	120450	983.424	96.6312
1393.17	120550	1261.07	128.425
1393.33	120650	1011.34	132.589
1393.5	120750	1254.47	77.3924
1393.66	120850	1034.86	89.6419
1393.83	120950	1046.53	86.5782
1393.99	121050	967.52	61.1541
1394.16	121150	1143.09	52.7131
1394.32	121250	1498.49	69.7301
1394.49	121350	1303	39.3856
1394.65	121450	1940.29	59.6389
1394.82	121550	1393.74	45.7892
1394.99	121650	1382.02	59.4663
1395.16	121750	1242.15	96.644
1395.33	121850	1082.61	97.7654
1395.49	121950	1037.65	70.194
1395.66	122050	972.725	104.487
1395.83	122150	1015.85	71.2125
1396	122251	1040.43	57.8812
1396.17	122350	1261.22	53.1967
1396.35	122450	993.763	50.4908
1396.52	122550	1192.04	168.569
1396.69	122650	757.886	324.879
1396.87	122750	905.578	172.912
1397.04	122850	941.932	91.5482
1397.22	122950	1496.99	68.7379
1397.4	123050	1503.28	89.4476
1397.58	123150	1222.16	85.6455
1397.76	123250	1353.85	58.4441
1397.94	123350	1393.3	81.6645
1398.12	123450	1117.89	73.7829
1398.3	123550	1133.45	63.3002
1398.48	123650	1243.53	65.499
1398.66	123750	1188.3	95.3119
1398.84	123850	1036.8	117.978
1399.02	123950	NaN	NaN
1399.2	124050	707.882	105.833
1399.39	124150	687.251	124.564
1399.57	124250	1001.31	88.3907
1399.75	124350	1173.47	92.3013
1399.94	124450	877.851	93.7206
1400.12	124550	873.73	106.363
1400.31	124650	839.419	67.3412
1400.49	124750	841.571	91.0796
1400.68	124850	723.15	118.706
1400.87	124950	722.307	95.6624
1401.06	125050	754.786	96.0778
1401.24	125150	677.549	76.324
1401.43	125250	741.099	95.0099
1401.62	125350	924.049	83.7211
1401.81	125450	738.91	79.0114
1402	125551	682.987	88.7057
1402.19	125650	780.329	55.0119
1402.39	125750	709.609	84.8902
1402.58	125850	659.453	60.5107
1402.77	125950	628.951	75.2474
1402.97	126050	653.587	84.4824
1403.16	126150	547.278	53.3255
1403.36	126250	668.811	94.8119
1403.56	126350	532.246	66.7883
1403.76	126450	620.331	70.2745
1403.96	126552	488.885	82.2764
1404.18	126650	561.623	78.4707
1404.4	126750	759.346	68.4181
1404.62	126850	671.641	67.4181
1404.85	126950	601.051	69.037
1405.08	127050	607.916	168.681
1405.31	127150	595.818	73.6642
1405.55	127250	561.338	57.5757
1405.79	127350	538.561	77.5895
1406.03	127451	404.68	105.38
1406.28	127550	391.649	109.369
1406.53	127650	398.439	142.981
1406.77	127750	516.905	75.7619
1407.03	127851	590.701	104.898
1407.29	127950	737.084	108.54
1407.55	128050	695.816	110.624
1407.82	128150	794.977	134.589
1408.09	128251	472.551	92.2234
1408.38	128350	291.716	106.177
1408.67	128450	472.756	145.58
1408.95	128550	506.227	101.401
1409.25	128650	500.684	98.3579
1409.54	128750	533.25	86.1794
1409.83	128850	542.692	101.38
1410.12	128950	497.251	148.408
1410.41	129050	572.133	109.345
1410.7	129150	560.588	119.779
1410.99	129249	535.895	107.943
1411.27	129350	539.711	82.4738
1411.55	129450	563.817	119.173
1411.83	129550	637.038	90.4712
1412.11	129650	614.874	91.3419
1412.39	129750	592.825	102.086
1412.66	129850	609.914	110.288
1412.94	129949	489.844	104.517
1413.2	130050	552.293	124.092
1413.45	130150	572.482	100.816
1413.71	130250	538.62	126.968
1413.96	130348	570.673	126.855
1414.2	130450	555.911	119.52
1414.42	130550	531.852	143.042
1414.65	130650	622.806	108.247
1414.88	130750	627.415	65.7744
1415.1	130850	727.17	90.4374
1415.32	130950	763.399	110.198
1415.53	131050	705.249	116.578
1415.75	131150	675.331	142.832
1415.96	131249	692.876	93.4249
1416.16	131350	713.897	72.1367
1416.36	131450	733.953	126.549
1416.56	131550	863.173	118.801
1416.76	131650	909.172	135.368
1416.96	131748	824.978	146.656
1417.14	131850	983.58	129.208
1417.32	131950	1002.81	138.432
1417.5	132050	952.794	156.207
1417.68	132150	849.97	145.876
1417.85	132250	981.113	171.101
1418.02	132348	1083.92	99.9396
1418.19	132450	1136.76	91.1301
1418.34	132550	1042.31	94.5741
1418.5	132650	1084.27	131.838
1418.66	132750	1092.93	120.453
1418.82	132850	1167.48	102.522
1418.97	132948	1048.71	166.1
1419.12	133050	1053.13	187.257
1419.25	133150	1135.3	144.338
1419.39	133250	1423.81	156.339
1419.52	133350	1145.97	141.325
1419.66	133450	1205.42	144.213
1419.79	133550	1074.58	138.064
1419.93	133650	1008.62	215.17
1420.06	133750	1109.66	147.335
1420.18	133850	1161.67	135.762
1420.3	133950	1268.34	236.53
1420.42	134050	1165.97	244.402
1420.55	134150	1096.36	235.476
1420.67	134250	1388.11	195.119
1420.79	134350	1158.96	248.313
1420.91	134450	1002.71	259.013
1421.03	134549	913.814	323.602
1421.14	134650	1052.52	241.156
1421.25	134750	1080.48	273.188
1421.36	134850	1163.82	241.794
1421.47	134950	1270.22	285.069
1421.58	135050	1136.7	267.431
1421.68	135150	1113.33	281.45
1421.79	135250	1087.95	276.539
1421.9	135350	1087.42	263.87
1422.01	135448	1555.77	397.813
1422.11	135550	1378.74	341.279
1422.2	135650	1306.92	310.534
1422.3	135750	1392.06	358.521
1422.4	135850	1171.39	386.008
1422.5	135950	1424.28	415.124
1422.59	136050	1068.15	571.93
1422.69	136150	1103.74	426.376
1422.79	136250	1081.67	372.726
1422.88	136350	1057.07	323.185
1422.98	136448	1123.04	284.787
1423.07	136550	1254	290.014
1423.15	136650	1079.9	392.172
1423.23	136750	1134.94	375.571
1423.31	136850	1143.48	344.346
1423.39	136950	1093.19	358.086
1423.47	137050	1205.67	445.443
1423.55	137150	1174.48	424.217
1423.63	137250	1118.35	373.943
1423.72	137350	1281.19	355.909
1423.8	137450	1251.48	358.926
1423.88	137550	1157.38	321.05
1423.96	137650	1440.58	314.79
1424.04	137750	1409.03	258.282
1424.12	137850	1281.96	280.157
1424.2	137950	1200.22	248.753
1424.28	138050	1291.87	261.751
1424.36	138150	1243.26	214.146
1424.44	138250	1319.62	260.281
1424.53	138350	1239.69	256.192
1424.61	138450	1173.35	315.675
1424.69	138550	1170.19	309.862
1424.77	138650	1088.1	430.82
1424.85	138750	1024.81	499.312
1424.93	138850	1159.25	518.557
1425.01	138950	1315.77	469.927
1425.09	139050	1429.49	494.867
1425.17	139150	1107.94	546.35
1425.25	139250	1303.58	450.128
1425.33	139350	1210.51	411.818
1425.4	139450	1211.4	451.522
1425.48	139550	1115.37	422.793
1425.56	139650	1123.95	435.126
1425.64	139750	1252.01	434.647
1425.72	139850	1137.95	458.62
1425.8	139950	1137.81	473.686
1425.88	140050	1243.27	538.692
1425.96	140150	1412.06	466.701
1426.04	140250	1415.86	399.547
1426.12	140350	1202.62	458.137
1426.2	140450	1186.21	546.812
1426.29	140550	1173.04	519.188
1426.37	140650	1270.85	541.288
1426.45	140750	1200.93	468.659
1426.53	140849	1302.29	430.761
1426.61	140950	1366.87	412.069
1426.7	141050	1543.07	584.388
1426.78	141150	1317.17	569.824
1426.86	141250	1377.74	427.237
1426.94	141350	1362.33	444.349
1427.02	141450	1616.05	291.838
1427.11	141550	1283.56	479.302
1427.19	141650	1220.26	432.395
1427.28	141749	1374.34	437.524
1427.36	141850	1432.07	530.825
1427.45	141950	1325.46	591.954
1427.53	142050	1342.12	572.842
1427.62	142150	1431.01	512.624
1427.7	142250	1368.88	580.344
1427.79	142350	1201.2	570.014
1427.87	142450	1298.15	460.63
1427.96	142551	1099.85	563.097
1428.04	142650	1340.47	495.274
1428.13	142750	1489.63	548.4
1428.22	142850	1526.87	583.045
1428.31	142950	1301.07	516.562
1428.4	143050	1440.29	477.522
1428.49	143150	1482.49	605.873
1428.58	143250	1516.37	585.859
1428.67	143350	1284.62	634.596
1428.75	143450	1336.34	516.526
1428.84	143550	1483.59	444.927
1428.93	143650	1415.32	645.026
1429.02	143750	1590.15	399.718
1429.11	143850	1280.44	429.858
1429.2	143950	1257.41	505.727
1429.29	144050	1376.95	656.573
1429.38	144150	1322.06	505.485
1429.47	144250	1369.22	417.636
1429.56	144350	1514.77	458.241
1429.65	144450	1482.72	445.242
1429.74	144550	1421.1	521.079
1429.83	144650	1472.43	589.57
1429.92	144750	1224.97	466.797
1430.01	144850	1305.25	349.457
1430.1	144950	1331.91	419.786
1430.19	145050	1313.24	448.78
1430.28	145150	1431.83	486.673
1430.37	145250	1578.13	479.558
1430.46	145350	1478.3	985.601
1430.55	145450	1139.27	569.943
1430.64	145550	985.003	707.658
1430.73	145650	1295.07	351.116
1430.83	145750	1263.22	281.074
1430.92	145850	1289.5	295.867
1431.01	145950	1274.84	266.563
1431.1	146050	1175.06	356.459
1431.19	146150	1277.21	409.168
1431.28	146250	1459.74	752.695
1431.37	146350	1340.26	893.797
1431.46	146450	1615.19	688.812
1431.55	146550	1448.55	627.155
1431.64	146650	1213.92	576.47
1431.73	146750	1526.85	532.781
1431.82	146850	1392.32	482.776
1431.91	146950	1527.43	489.864
1432	147049	1708.16	492.305
1432.09	147150	1462.32	476.074
1432.18	147250	1440.69	535.803
1432.26	147350	1390.23	609.513
1432.35	147450	1341.33	595.917
1432.43	147550	1451.17	497.922
1432.52	147650	1467.48	512.677
1432.6	147750	1579.53	655.701
1432.69	147850	1493.15	698.255
1432.78	147950	1455.54	549.957
1432.86	148050	1439.75	516.865
1432.95	148150	1526.95	501.065
1433.03	148250	NaN	NaN
1433.12	148350	1427.11	546.732
1433.2	148450	1332.69	619.868
1433.29	148550	1524.5	552.868
1433.38	148650	1617.6	616.812
1433.46	148750	1726.42	776.974
1433.55	148850	1406.77	795.123
1433.64	148950	1527.92	614.526
1433.72	149050	1603.12	589.807
1433.81	149150	1622.66	465.048
1433.9	149250	1667.76	543.904
1433.99	149351	1621.91	448.353
1434.08	149450	1898.44	422.276
1434.17	149550	1509.93	339.513
1434.26	149650	1264.37	255.065
1434.35	149750	1391.73	202.082
1434.44	149850	1401.24	185.645
1434.54	149950	1580.35	166.583

## Sheet: TALDICE_500yr_fluxes
TALDICE 500yr mean fluxes
Column 1: Depth from top (m)
Column 2: AICC2012 ice age (yrs BP, i.e. before 1950 AD)
Column 3: Na flux (ug/m^2/a)
Column 4: Ca flux (ug/m^2/a)
Depth	Ice age (AICC2012)	J_ssNa	J_ssCa
(m)	(a BP, i.e. before 1950 AD)	(ug/m^2/a)	(ug/m^2/a)
131.38	1246.91	NaN	NaN
169.619	1749.4	NaN	NaN
205.545	2252.67	NaN	NaN
239.594	2744.92	NaN	NaN
271.822	3247.31	NaN	NaN
302.494	3749.83	754.985	52.9323
331.327	4247.49	788.462	55.8746
358.711	4752.71	644.86	50.9863
384.83	5254.15	703.566	64.0664
410.007	5748.43	829.784	70.0523
434.976	6251.01	967.081	69.7325
459.567	6739.76	636.55	93.5626
483.504	7250.29	470.905	226.651
506.313	7746.99	NaN	NaN
527.742	8249.16	499.73	265.95
548.365	8749.94	NaN	NaN
569.011	9252.92	NaN	NaN
590.029	9750.28	555.168	204.249
611.424	10252.5	462.086	235.798
632.922	10745.1	641.372	179.106
654.245	11249.4	727.876	121.419
675.028	11741	821.519	115.684
693.558	12238.5	918.738	84.7859
709.204	12742.4	1069.02	77.5225
723.33	13247.7	1224.87	89.397
736.844	13748.4	1278.15	142.129
750.02	14249.1	1097.3	106.567
763.132	14746	1012.59	154.467
775.407	15247.1	1269.76	216.194
786.335	15742.3	1418.02	162.91
796.554	16245.5	1430.38	232.282
806.172	16752.6	1487.71	286.48
815.013	17246.4	1768.86	348.452
823.076	17745.2	1977.08	526.479
830.483	18249.2	1912.86	485.271
837.423	18744.2	1315.01	519.876
844.12	19246.5	1197.6	512.769
850.429	19743.9	1206.09	559.304
856.319	20247	1201.28	612.003
861.803	20747.4	1116.63	596.262
866.886	21243.8	1137.83	616.861
871.76	21751.3	1231.04	578.481
876.628	22250.6	1355.64	628.579
881.499	22749.5	1427.86	469.564
886.239	23249.9	1199.13	475.23
890.885	23745.9	1089.58	395.377
895.442	24255.4	1177.91	513.942
899.963	24750.7	1135.11	575.921
904.598	25248.1	976.509	775.633
909.229	25747.9	971.044	481.393
913.762	26246.8	1212.3	564.425
918.301	26749.5	1087.07	555.982
922.808	27248	1424.72	532.785
927.434	27752.7	1376	446.225
932.293	28247.3	1187.02	500.161
937.298	28761	1176.08	391.341
942.591	29248.9	1464.81	347.708
948.202	29746.3	1787.67	463.181
953.728	30241.6	1183.8	561.386
959.02	30752.3	1651.35	510.495
964.219	31250.6	1613.63	448.962
969.282	31748.7	1797.92	463.943
974.484	32259.1	1694.92	249.948
979.936	32747.7	1639.44	248.264
985.235	33248.7	1551.73	279.699
990.591	33749	1398.92	229.632
996.11	34249	1383.75	238.065
1001.58	34754.1	1409.99	259.485
1007.31	35255	1694.18	160.375
1013.33	35748.6	1356.13	202.631
1019.32	36248.3	1287.62	229.876
1025.36	36759.2	1559.99	245.398
1031.7	37250.3	1539.49	180.723
1038.44	37759.4	1676.41	121.661
1045.84	38254.9	1588.11	118.227
1053.68	38751.3	1625.06	115.691
1061.36	39242.8	1675.4	156.728
1068.46	39743.9	2026.04	276.973
1075.37	40249	2031.82	321.584
1082.19	40745.2	2641.1	247.828
1088.67	41253.6	1921.55	195.99
1094.93	41744.3	1916.82	230.096
1100.76	42252.4	1855.95	218.746
1106.28	42751.5	1784.68	180.911
1111.84	43254.4	1879.28	166.415
1117.48	43752.5	1735.58	204.424
1123.17	44249.4	1955.87	208.046
1129	44752.3	1924.04	147.177
1135.23	45250.9	1932.9	94.1776
1141.98	45749.3	1721.52	113.281
1149.05	46254.3	1614.73	75.9622
1156.07	46742.2	1590.97	80.3982
1162.48	47240.2	1514.02	160.213
1168.1	47748.7	1426.07	125.681
1173.08	48236.6	1465.78	219.412
1177.48	48745.6	1600.85	217.451
1181.62	49251.3	1529.87	275.829
1185.73	49752.1	1400.77	274.742
1189.77	50242.7	1560.74	232.946
1193.72	50751	1779.4	153.91
1197.66	51250.2	1877.07	134.529
1201.59	51746.8	1551.49	157.948
1205.54	52252.4	1578.69	139.676
1209.52	52748.4	1527.64	163.588
1213.42	53249.8	1679.39	117.19
1217.24	53754	1703.42	75.5337
1221.09	54247.7	1858.93	66.5517
1224.88	54745.4	1791.25	123.799
1228.52	55248.5	1822.33	151.404
1232.01	55754	1777.88	172.389
1235.38	56241.8	1932.72	180.873
1238.54	56747.1	1890.21	239.045
1241.65	57254.4	2205.86	234.595
1244.91	57752.8	2175.45	159.468
1248.24	58251	1749.02	110.964
1251.58	58748.4	2427.1	113.024
1254.95	59247.3	2211.7	104.68
1258.28	59745	2061.74	94.0595
1261.41	60247.5	1949.22	105.486
1264.32	60746.1	1618.16	186.328
1267.04	61245	1549.64	253.753
1269.6	61749.7	2083.45	228.491
1272.08	62246.2	2466.36	287.882
1274.4	62742.1	NaN	NaN
1276.54	63245.5	NaN	NaN
1278.54	63746.4	2278.27	652.522
1280.42	64251.3	1612.71	456.182
1282.32	64749.4	1458.03	329.159
1284.19	65240	1493.65	332.11
1285.93	65749.4	1460.15	342.506
1287.59	66246.5	1235.9	360.718
1289.16	66743.5	1324.03	470.543
1290.64	67248	1336.69	403.849
1292.05	67745.4	1267.34	397.122
1293.4	68247.6	1083.24	479.05
1294.68	68748.1	1245.45	467.252
1295.91	69251.5	1274.57	437.508
1297.12	69747.7	1119.34	283.339
1298.31	70248.1	1199.18	368.998
1299.48	70750.3	1163.37	265.519
1300.66	71253.7	1252.13	136.342
1301.9	71752	1255.65	112.724
1303.18	72249.5	1126.84	65.5658
1304.44	72748.4	1093.62	72.9546
1305.66	73247.8	1037.24	101.706
1306.83	73743.8	1189.46	194.526
1307.96	74256.1	1229.36	163.954
1309.11	74754.6	1165.43	112.468
1310.35	75257.1	1277	120.065
1311.7	75750	1109.55	76.7646
1313.09	76246.8	1224.27	91.6194
1314.4	76745.5	1156.23	135.789
1315.62	77249.2	1220.97	224.162
1316.8	77752.5	1228.87	184.771
1318	78247.6	1246.05	154.952
1319.18	78747.6	1158.34	141.032
1320.33	79249.5	1149.51	119.061
1321.48	79750.1	1025.73	109.987
1322.64	80250.4	1032.05	90.3635
1323.79	80750.3	1004.63	82.2241
1324.96	81254	995.171	100.528
1326.15	81749.1	1016.11	65.0215
1327.35	82250.1	935.082	68.1641
1328.53	82749.2	832.815	73.3951
1329.69	83251.6	838.593	69.3647
1330.86	83748.9	762.97	54.4218
1332.03	84247.7	869.149	65.6681
1333.16	84744.5	939.389	67.3814
1334.25	85249	992.451	58.2496
1335.31	85749.1	995.59	92.2902
1336.33	86248.3	1077.71	85.9319
1337.32	86748.3	1084.01	97.7268
1338.26	87245.9	1122.83	127.116
1339.13	87743.2	1076.31	181.814
1339.95	88245.4	1168.75	255.174
1340.75	88750.3	1155.76	372.52
1341.54	89249.9	1187.28	123.742
1342.35	89750.9	1229.18	74.0854
1343.2	90253.7	1253.37	109.3
1344.09	90753.1	1275.94	113.817
1345	91251.1	1221.39	84.5242
1345.92	91750.6	1298.25	94.7035
1346.85	92251.1	1363.84	79.532
1347.78	92750.8	1283.02	86.674
1348.73	93251.6	1330.43	95.627
1349.7	93751.9	1339.93	68.1517
1350.7	94250.3	1282.52	75.2833
1351.72	94750.5	1240.52	101.351
1352.75	95251	1233.11	73.6398
1353.79	95750.3	1178.27	126.709
1354.83	96250.4	1242.59	81.8631
1355.89	96751.3	1211.32	95.0188
1356.95	97252.5	1198.79	96.2672
1358.04	97748.9	1103.7	89.6027
1359.11	98247.7	1100.71	105.238
1360.17	98749.5	1144.82	114.22
1361.21	99249	1338.71	94.9385
1362.24	99748.7	1485.34	92.8511
1363.26	100250	1113.53	133.626
1364.28	100751	1128.76	148.789
1365.31	101251	962.193	112.367
1366.35	101750	1044.79	96.5998
1367.36	102247	984.552	90.3154
1368.29	102748	1006.68	131.218
1369.17	103245	1157.07	164.98
1370.01	103743	1080.06	171.883
1370.82	104251	983.568	135.968
1371.63	104749	1312.92	79.9657
1372.43	105250	1002.56	41.9456
1373.21	105747	1010.63	106.379
1373.97	106256	946.529	107.984
1374.73	106745	1007.17	111.685
1375.45	107250	1524.07	73.1568
1376.1	107737	1415.51	123.922
1376.7	108250	1476.22	126.307
1377.24	108749	1194.17	160.531
1377.75	109250	1050.37	182.533
1378.25	109750	1066.24	174.429
1378.74	110250	1088.64	199.595
1379.24	110750	1083.19	252.076
1379.75	111250	1093.07	335.316
1380.28	111750	1170.82	263.803
1380.83	112253	1244.54	145.304
1381.4	112750	1275.58	124.129
1381.99	113258	1311.95	108.95
1382.61	113750	1361.71	104.755
1383.24	114251	1265.87	92.0345
1383.89	114754	1382.98	109.951
1384.56	115250	1294.66	67.225
1385.25	115750	1134.89	61.3863
1385.96	116266	1278.9	67.4563
1386.73	116752	1398.17	77.9654
1387.55	117250	1531.39	108.238
1388.41	117751	1487.02	240.504
1389.29	118249	1194.85	72.9771
1390.16	118748	1121.7	93.6094
1391.01	119248	1009.85	110.667
1391.84	119749	1009.14	137.81
1392.67	120250	868.741	183.036
1393.5	120750	1148.21	92.5557
1394.32	121250	1321.55	51.8424
1395.16	121751	1246.59	67.6689
1396.01	122253	1030.22	70.611
1396.87	122753	1131.79	130.957
1397.76	123251	1280.82	80.3044
1398.66	123750	1138.75	84.2757
1399.57	124250	898.272	100.964
1400.49	124750	789.63	95.8401
1401.43	125250	758.044	84.4461
1402.39	125750	700.107	70.1378
1403.36	126251	612.107	68.1842
1404.41	126754	592.673	75.3028
1405.56	127252	571.632	80.0529
1406.79	127755	497.877	111.969
1408.12	128259	561.545	117.747
1409.54	128750	526.211	100.209
1410.98	129247	557.586	107.087
1412.38	129748	598.38	99.7485
1413.69	130243	554.953	122.519
1414.87	130744	631.261	108.119
1415.94	131242	698.862	113.349
1416.94	131737	901.824	137.975
1417.84	132241	1000.09	126.376
1418.66	132748	1133.72	114.212
1419.39	133250	1148.1	149.621
1420.05	133738	1112.02	152.778
1420.67	134250	1110.87	248.855
1421.25	134749	1097.19	265.359
1421.79	135247	1113.89	272.445
1422.3	135750	1344.52	345.902
1422.78	136248	1100.54	376.596
1423.23	136750	1148.18	356.706
1423.63	137250	1221.87	376.199
1424.04	137749	1275.33	284.974
1424.44	138250	1243.07	262.38
1424.85	138749	1107.99	477.225
1425.25	139250	1283.36	460.95
1425.64	139750	1155.25	441.531
1426.04	140253	1251.54	473.852
1426.45	140750	1266.72	456.783
1426.86	141252	1409.27	451.379
1427.28	141750	1330.61	490.378
1427.7	142250	1376.89	527.041
1428.13	142752	1317.01	537.1
1428.58	143250	1349.22	582.842
1429.02	143751	1431.03	461.154
1429.47	144250	1423.1	454.17
1429.92	144751	1333.2	512.58
1430.37	145250	1342.03	518.896
1430.83	145750	1326.95	298.427
1431.28	146250	1526.54	625.724
1431.73	146750	1410.4	543.215
1432.17	147249	1429.81	537.51
1432.6	147750	1454.75	555.997
1433.03	148251	1443.18	534.14
1433.46	148750	1551.66	633.588
1433.9	149254	1647.42	524.224
1434.35	149750	1434.08	205.485
